# Supplementary material for: Dinocyst assemblage constraints oceanographic and atmospheric processes in the Eastern Equatorial Atlantic over the last 44 ka
Source: Copernicus journal article supplement (doi:10.5194/bg-2016-148), 2016-04-21
Supplement: Supplementary file 1 [file KZAI01data.xls]

## Sheet: Counting
Depth (cm)	Age ka cal. BP	Bitectatodinium tepikiense	Impagidinium aculeatum	Impagidinium paradoxum	Impagidinium patulum	Impagidinium sphericum	Impagidinium strialatum	Impagidnium spp	Lingulodinium machaerophorum	Nematosphaeropsis labyrinthus	Operculodinium centrocarpum	Operculodinium israelianum	Operculodinium janduchenei	Operculodinium aguinawense	Operculodinium spp	Polysphaeridium zoharyi	Pyxidinopsis reticulata	Spiniferites membranaceus	Spiniferites pachydermus	Spiniferites ramosus	Spiniferites bentorii	Spiniferites mirabilis	Spiniferites spp	Pentapharsodinium dalei	Brigantedinium spp	Protoperidinium spp.	Lejeunecysta sabrina	Lejeunecysta oliva	Selenopemphix nephroides	Xandarodinium xanthum	Selenopemphix quanta	Stelladinium reidii	Trinovantedinium applanatum	Votadinium calvum	Votadinium spinosum	Protoperidinium americanum	Quinquecuspis concreta	Polykrikos schwartzii	Polykrikos kofoidii	Tuberculodinium vancampoae	Echinidinium spp	Echinidinium aculeatum	Echinidinium granulatum	Echinidinium delicatum	Echinidinium transparentum	TOTAL	Pediastrum + Concentricystes
0	1465.04	0	0	0	0	0	0	0	18	0	200	1	0	0	0	0	0	8	4	0	1	2	0	2	5	0	0	0	0	0	0	0	0	0	0	0	0	0	0	0	8	4	2	3	1	259	0
5	1614.02	0	1	0	0	0	0	0	18	1	352	4	1	0	0	0	0	2	7	0	0	2	0	0	15	0	1	0	1	0	4	0	0	0	0	0	0	0	0	1	4	13	3	10	0	440	0
10	1763	0	1	0	0	0	0	0	17	2	432	0	0	0	0	0	0	4	12	1	0	3	0	1	24	0	0	0	4	0	6	0	0	0	0	0	0	0	0	1	9	5	4	8	3	537	0
15	1911.98	0	0	0	0	0	0	0	4	4	281	4	1	0	0	1	0	6	8	1	1	3	1	1	19	0	0	0	2	1	7	0	0	2	0	0	0	3	0	3	4	3	4	15	3	382	0
20	2060.96	0	0	0	0	0	0	0	1	5	313	1	0	0	0	0	0	7	22	1	2	3	0	1	16	0	0	0	6	0	4	0	2	0	0	0	0	0	0	3	0	6	11	22	3	429	0
25	2209.94	0	0	0	1	0	0	0	1	7	501	4	0	3	0	0	0	6	48	2	2	5	2	2	3	0	0	0	5	0	2	0	0	0	0	0	0	0	0	0	5	0	1	5	0	605	0
30	2358.92	0	0	0	0	0	0	0	1	6	307	3	0	0	0	0	0	5	22	0	2	2	2	0	16	0	0	0	3	0	9	0	0	1	0	0	0	0	0	0	1	5	7	17	2	411	0
35	2507.9	0	0	0	1	0	0	0	1	4	363	2	0	0	0	0	0	10	46	1	3	3	3	0	14	0	0	0	3	0	3	0	0	1	0	0	0	0	0	3	3	0	2	13	0	479	0
40	2656.88	0	0	0	0	0	0	0	1	10	516	4	1	0	0	0	2	11	137	1	4	2	6	1	19	0	0	0	6	0	5	0	0	0	0	0	0	0	0	2	1	0	1	16	2	748	0
45	2805.86	0	0	0	0	0	0	0	1	8	461	5	0	0	0	0	1	18	133	1	1	8	13	1	24	0	0	0	5	0	5	0	1	0	0	0	0	0	0	0	3	0	0	6	0	695	0
50	2954.84	0	0	0	1	0	0	0	1	8	415	3	0	0	0	0	0	4	130	13	6	1	6	0	16	0	0	0	4	0	2	0	1	0	0	0	0	0	0	1	0	0	0	3	0	615	0
55	3103.82	0	0	0	0	0	0	0	1	11	383	3	0	0	0	0	0	16	91	1	1	2	7	0	24	0	0	0	2	0	5	0	0	1	0	0	0	0	0	0	0	0	0	9	3	560	0
60	3252.8	0	0	0	0	0	0	0	0	7	492	1	0	0	0	0	0	17	81	0	0	2	9	0	13	0	1	0	2	0	3	0	0	0	0	0	0	0	0	2	0	0	2	12	0	644	0
65	3401.78	0	0	0	0	0	0	0	2	6	460	3	1	1	0	0	0	10	105	0	0	9	3	0	3	0	0	0	3	0	2	0	0	1	0	0	0	0	0	1	2	0	2	5	1	620	0
70	3550.76	0	0	0	0	0	0	0	1	1	298	1	2	1	0	0	0	17	122	4	7	4	10	2	13	0	2	0	0	0	3	0	0	0	0	0	0	1	0	1	0	2	2	3	0	497	0
75	3699.75	0	0	0	0	0	0	0	1	7	192	4	0	0	0	0	0	2	205	1	0	4	7	0	8	0	1	0	1	0	3	0	0	1	0	0	0	0	0	0	2	0	0	1	0	440	0
80	3848.73	0	1	0	0	0	0	0	3	1	273	2	1	0	0	0	0	8	99	2	0	10	5	0	16	0	0	0	0	0	6	0	0	1	0	0	0	0	0	3	0	2	3	11	1	448	0
85	3997.71	1	0	0	0	0	1	0	2	5	156	1	0	0	1	1	0	11	60	3	0	8	2	0	19	0	0	0	4	0	6	0	0	1	0	0	0	0	0	5	2	1	1	10	1	302	0
90	4146.69	0	0	0	0	0	0	0	2	5	23	0	0	0	0	0	0	25	34	1	0	12	2	0	66	0	0	0	4	0	3	1	0	2	0	0	0	2	0	2	0	6	0	7	3	200	0
95	4295.67	0	0	0	0	0	0	0	4	3	46	1	0	1	0	0	0	5	31	3	2	8	0	0	30	0	0	0	0	0	3	0	0	2	0	0	0	1	0	2	7	0	2	3	0	154	0
100	4444.65	0	0	0	0	0	0	0	1	0	12	1	0	0	1	0	0	2	33	2	0	4	0	0	10	0	0	0	2	0	2	0	0	0	0	0	0	1	0	0	3	0	0	1	0	75	0
105	4593.63	0	0	0	0	1	0	0	1	0	11	1	0	0	0	0	0	1	28	0	0	1	2	0	17	0	0	0	0	0	2	0	0	0	0	0	0	0	0	0	0	0	0	0	0	65	0
110	4742.61	0	0	1	1	0	0	0	2	3	100	4	0	0	2	1	0	11	46	3	1	13	3	0	42	0	0	0	7	0	10	0	0	0	0	0	0	2	0	3	0	6	0	14	8	283	1
120	4891.59	0	1	0	0	0	0	0	2	1	22	3	0	0	0	0	0	6	0	1	0	7	1	1	58	1	0	0	0	0	6	1	0	0	0	0	0	0	0	1	1	3	6	7	2	131	3
125	5040.57	0	0	0	0	0	1	0	1	1	56	1	0	1	0	0	0	3	9	0	0	8	1	0	21	0	0	0	7	0	7	2	0	0	0	0	0	0	0	0	0	0	0	0	0	119	0
130	5189.55	0	0	0	0	0	0	0	1	9	46	3	0	0	0	1	0	1	0	1	2	2	0	0	30	0	0	0	0	0	1	0	0	0	0	0	0	0	0	2	19	0	0	0	0	118	0
135	5338.53	0	0	0	0	0	0	0	1	1	36	0	0	0	1	0	0	1	2	0	1	3	0	0	21	0	1	0	3	0	1	0	0	0	0	0	0	0	0	0	0	0	0	1	0	73	0
140	5487.51	0	0	0	0	0	0	0	0	14	75	1	1	0	0	0	0	6	0	1	0	2	1	4	34	0	0	1	2	0	1	0	0	0	0	0	0	0	0	2	18	0	0	0	0	163	0
145	5636.49	0	0	0	0	0	0	0	1	1	48	1	0	0	0	0	0	2	1	0	0	1	0	0	21	0	0	0	1	0	2	1	0	0	0	0	0	0	0	2	1	1	0	0	0	84	0
150	5785.47	0	0	0	0	0	0	0	0	6	123	2	1	0	0	0	0	3	0	2	1	1	0	1	18	0	0	0	1	0	1	0	0	0	0	0	0	0	0	0	18	0	0	0	0	178	0
155	5934.45	0	0	0	0	0	0	0	3	0	28	1	0	1	1	0	0	1	0	1	1	4	0	0	14	0	0	0	0	0	2	0	0	0	0	0	0	0	0	1	1	0	0	1	0	60	0
160	6083.43	0	0	0	0	0	0	0	2	4	85	2	0	4	1	0	0	3	0	0	1	9	0	0	41	0	1	0	2	0	2	3	0	0	0	0	0	0	0	0	0	1	1	6	0	168	0
170	6232.41	0	0	0	0	0	0	0	2	0	12	3	0	3	3	0	0	9	1	0	0	7	1	0	40	0	0	0	0	0	2	6	0	1	0	0	0	0	0	1	6	1	2	5	0	105	0
175	6381.39	0	0	0	0	0	0	0	2	0	31	0	0	0	0	0	0	2	0	3	0	2	2	0	11	0	0	0	3	0	6	0	0	1	0	0	0	0	0	0	1	1	0	0	0	65	0
180	6530.37	0	0	0	0	0	0	0	1	0	7	0	0	1	0	0	0	3	0	1	0	4	1	0	47	0	0	1	3	0	3	13	0	0	0	0	0	0	0	0	1	7	0	7	1	101	0
190	6679.35	0	0	0	0	0	0	0	2	0	0	3	0	0	0	0	0	9	0	0	0	5	0	0	49	0	0	0	3	0	3	6	0	1	0	0	0	0	0	1	13	10	1	1	3	110	0
195	6828.33	0	0	0	0	0	0	0	0	0	12	0	0	0	0	0	0	1	1	0	0	5	1	0	47	0	0	0	12	1	4	7	1	1	0	0	0	0	0	0	2	0	2	1	0	98	0
200	6977.31	0	0	0	0	0	0	0	2	3	27	2	1	1	1	2	0	2	4	0	1	4	3	0	16	0	0	0	2	1	1	1	0	0	0	0	0	0	0	2	8	4	1	3	0	92	0
205	7126.29	0	0	0	0	0	0	0	2	0	3	0	0	1	0	1	0	7	2	0	0	5	0	0	32	0	0	0	1	2	4	8	0	0	0	0	0	0	0	0	6	1	3	0	2	80	0
210	7275.27	0	0	0	0	0	0	0	1	0	2	1	0	2	0	2	0	8	0	1	0	9	0	0	53	0	6	0	1	0	6	5	0	0	0	0	0	0	0	0	5	6	5	9	0	122	0
215	7424.25	0	0	0	0	0	0	0	1	0	0	1	0	0	1	0	0	1	0	1	0	4	0	0	43	0	0	0	0	1	1	5	0	0	0	0	0	0	0	0	4	2	1	0	0	66	0
220	7573.24	0	0	0	0	0	0	0	2	1	0	1	0	0	2	0	0	2	0	0	0	0	1	0	64	0	0	0	4	1	2	9	0	0	0	0	0	0	0	0	2	0	2	6	0	99	0
225	7722.22	0	0	0	0	0	1	0	5	7	10	1	0	0	4	1	1	6	0	3	2	4	2	6	43	0	0	0	2	1	4	9	0	0	0	0	0	0	0	1	15	0	0	0	0	128	0
230	7871.2	0	2	0	0	0	0	0	1	1	2	0	0	0	0	0	0	6	0	3	0	5	1	0	58	0	0	0	1	0	7	17	0	0	0	0	0	0	0	0	10	1	2	1	0	118	0
240	8020.18	0	0	0	0	0	0	0	2	1	2	0	0	0	1	0	0	5	1	3	1	11	1	0	112	0	0	0	4	0	6	21	0	1	0	0	0	0	0	0	7	1	0	7	0	187	0
250	8169.16	0	0	0	0	0	0	0	1	2	1	1	0	0	2	0	0	1	0	0	0	3	3	0	91	0	0	0	1	0	2	4	0	1	0	0	0	0	0	0	5	0	1	0	0	119	0
260	8318.14	0	0	0	0	0	0	0	1	1	0	0	0	0	1	0	0	5	0	1	0	2	1	0	79	0	1	0	2	2	5	16	0	0	0	0	0	0	0	0	7	1	1	2	1	129	0
265	8467.12	0	0	0	0	0	1	0	1	1	1	0	0	0	0	0	0	5	0	1	0	4	0	1	31	0	0	0	1	0	1	11	0	0	0	0	0	0	0	0	4	1	1	1	0	66	0
270	8616.1	0	0	0	0	0	0	0	1	1	1	0	0	0	1	0	0	2	0	1	1	3	0	0	71	0	0	1	1	0	3	13	0	0	0	0	0	0	0	0	9	3	2	4	0	118	0
280	8765.08	0	0	0	0	0	0	0	1	0	10	1	0	0	1	0	0	8	1	0	1	13	2	0	52	0	0	0	2	5	2	26	1	0	0	0	1	0	0	0	10	7	1	6	0	151	0
285	8914.06	0	0	0	0	0	0	0	0	0	5	0	0	0	0	0	0	0	0	1	0	3	0	0	29	0	0	0	4	2	5	5	0	0	0	0	0	0	0	0	5	5	0	3	0	67	0
290	9063.04	0	1	0	0	0	0	0	3	0	8	4	0	0	0	0	0	8	0	2	0	17	2	0	135	0	0	1	4	5	2	57	0	0	0	0	0	0	0	0	5	0	0	12	0	266	0
295	9212.02	0	0	0	0	0	0	0	1	2	0	1	0	0	0	0	0	2	0	0	0	3	0	0	36	0	0	0	2	4	2	10	0	1	0	0	1	0	0	0	11	0	1	7	1	85	0
300	9361	0	0	0	0	0	0	0	0	2	2	2	0	2	3	0	0	0	0	1	0	11	1	1	65	0	0	0	3	0	1	13	0	0	0	0	0	0	0	0	12	0	0	1	0	120	0
305	9542.32	0	0	0	0	0	0	0	0	1	0	1	0	1	2	1	0	0	0	1	1	5	0	0	31	0	1	0	2	0	5	3	0	0	0	0	1	1	0	0	11	0	1	1	0	70	0
310	9723.63	0	0	0	0	0	0	0	2	0	1	3	0	0	0	0	0	3	0	0	0	10	0	0	75	0	0	1	6	2	6	7	0	1	0	0	0	0	0	0	5	0	3	3	0	128	0
315	9904.95	0	0	0	0	0	0	0	0	1	0	0	0	0	2	0	0	4	0	0	0	9	0	0	34	0	0	0	6	0	0	6	0	0	0	0	0	0	0	0	11	0	0	3	1	77	0
320	10086.3	0	1	0	1	0	0	0	0	1	6	2	0	0	0	0	0	8	1	0	1	8	0	0	168	0	3	0	7	1	14	9	0	0	0	0	4	0	0	0	27	0	5	5	0	272	0
330	10267.6	0	1	0	0	0	0	0	0	0	2	0	0	0	0	0	0	4	0	1	0	6	0	0	84	0	0	0	4	1	11	2	0	0	0	0	0	0	0	0	14	0	5	1	0	136	0
335	10448.9	0	1	0	0	0	0	0	2	1	0	1	0	0	0	0	2	1	0	0	0	3	0	1	37	0	0	0	4	0	10	2	0	0	0	0	0	0	0	0	22	0	2	5	0	94	0
340	10630.2	0	0	0	0	0	0	0	2	0	4	3	0	0	1	0	0	5	1	2	1	4	0	0	107	0	1	0	3	0	10	2	0	0	0	0	1	2	0	2	15	0	1	6	2	175	0
345	10811.5	0	0	0	0	0	0	0	1	0	1	1	0	0	0	0	0	2	0	0	0	3	0	0	51	0	0	0	1	1	4	1	0	0	0	0	0	2	0	2	9	0	3	3	0	85	0
350	10992.8	0	0	0	0	0	0	0	5	0	6	4	0	0	0	0	0	1	0	1	0	2	0	0	74	0	0	0	3	0	6	0	0	0	0	0	2	0	0	0	8	0	0	1	0	113	0
355	11174.2	0	0	0	0	0	0	0	3	0	3	2	0	0	1	0	0	4	0	0	0	1	0	1	32	0	0	0	2	1	9	0	0	0	0	0	0	2	0	1	15	0	4	3	1	85	0
360	11355.5	0	0	0	0	0	0	0	4	1	6	4	0	0	2	0	0	1	0	3	0	1	4	0	67	0	0	0	1	5	8	5	0	1	0	0	2	0	0	0	12	0	5	2	0	134	1
365	11666.9	0	0	0	0	0	1	0	0	1	1	5	0	0	0	0	0	0	0	0	1	5	0	0	74	0	0	0	3	0	4	3	0	0	0	0	1	1	0	1	13	0	10	11	2	137	1
370	11816.3	0	0	0	1	0	0	0	5	1	3	6	0	0	0	1	0	4	0	0	0	3	0	3	91	0	1	0	3	1	1	0	0	0	0	0	0	0	0	0	36	0	4	13	2	179	0
375	11965.6	0	1	0	0	0	0	0	98	4	76	23	1	0	3	3	0	7	0	4	2	14	0	1	62	0	0	0	0	0	10	0	1	0	0	0	0	0	0	6	13	0	0	3	8	340	0
380	12115	0	0	0	0	0	0	0	1	2	6	3	0	0	1	0	0	1	0	0	1	7	1	1	107	0	0	0	2	1	6	24	0	1	0	0	0	0	0	1	24	0	3	10	0	203	1
385	12264.3	0	0	0	0	0	0	1	3	2	6	5	0	0	1	1	0	1	0	3	0	8	0	0	49	0	0	0	0	1	6	7	0	0	0	0	1	4	0	1	34	0	10	6	0	150	1
390	12413.6	0	1	0	0	0	0	0	5	4	5	4	0	0	3	0	0	2	0	0	0	5	0	0	94	0	0	0	7	0	6	3	0	0	0	0	0	0	0	0	30	0	5	7	0	181	0
395	12594.1	0	0	0	0	0	0	0	3	3	4	0	0	0	0	0	0	1	0	0	0	1	0	0	41	0	0	0	1	0	3	7	0	0	0	0	0	0	0	0	7	0	2	3	0	76	0
400	12782.3	0	0	0	0	0	0	0	2	0	14	5	0	0	1	1	0	0	0	0	0	3	1	0	104	0	0	0	1	1	5	7	0	0	0	0	0	0	0	0	19	0	0	0	0	164	0
415	12970.5	0	0	0	0	0	0	0	5	0	14	11	0	0	3	0	2	4	1	2	0	3	0	0	77	0	0	0	1	0	7	21	0	1	0	0	0	1	0	3	35	0	7	8	1	207	1
420	13158.7	0	0	0	0	0	0	0	8	1	24	16	0	0	3	0	1	4	2	2	0	6	1	2	105	0	0	0	1	0	8	8	0	0	0	0	1	0	0	0	88	0	7	17	2	307	0
425	13346.9	0	0	0	0	0	0	0	4	3	8	5	0	2	0	0	1	0	0	2	0	14	0	1	26	0	0	0	1	1	2	0	0	0	0	0	1	0	0	1	4	7	4	4	1	92	7
430	13535.1	0	0	0	0	0	0	0	36	1	56	18	0	0	5	0	0	11	3	2	1	6	1	1	93	0	0	0	0	1	6	19	1	0	0	0	0	0	0	7	44	0	0	0	0	312	0
435	13723.3	0	0	0	0	0	0	0	6	4	30	16	1	0	2	1	2	5	0	0	0	0	0	1	40	0	0	0	1	1	3	1	0	0	0	0	0	0	0	0	19	0	0	0	0	133	1
440	13911.5	0	1	0	0	0	0	0	19	2	172	58	0	3	1	0	0	2	0	5	0	16	0	1	113	0	0	0	2	0	5	0	1	0	0	0	1	1	0	7	0	0	0	16	5	431	2
445	14099.8	0	0	0	0	0	0	0	5	2	169	55	0	0	1	0	0	3	0	0	0	3	0	5	88	0	0	0	4	0	11	0	0	1	0	0	0	0	0	3	6	0	0	0	0	356	0
450	14664.4	0	0	1	1	0	0	0	7	1	122	132	0	0	3	1	0	0	1	2	1	6	2	2	33	0	0	0	2	0	0	0	0	0	0	0	0	0	0	3	3	0	0	0	0	323	0
455	14852.6	0	1	0	0	0	0	0	13	9	212	22	0	0	0	2	0	6	0	2	0	5	0	5	62	0	0	0	0	1	2	0	2	0	0	0	0	0	0	6	8	0	0	0	0	358	0
460	15040.8	0	1	0	0	0	2	0	23	5	176	10	0	0	1	6	0	5	1	6	0	8	0	1	51	0	0	0	1	1	7	0	0	0	0	0	0	0	0	5	6	0	0	0	0	316	0
465	15229	0	0	0	0	0	1	0	52	11	80	21	0	0	0	1	0	5	2	5	3	14	4	0	65	0	0	0	3	0	1	0	1	0	0	0	0	1	0	18	17	0	0	0	0	305	0
475	15417.2	0	0	0	0	0	0	1	39	8	77	13	0	0	0	5	0	5	2	8	5	34	2	0	50	0	0	0	2	0	1	0	6	0	0	0	0	0	0	64	11	0	0	0	0	333	0
480	15605.4	0	0	0	0	0	0	0	38	2	48	14	0	0	0	0	0	35	1	7	3	20	4	1	81	0	0	0	1	1	2	0	2	0	0	0	1	0	0	26	51	0	0	0	0	338	0
485	15803.6	0	0	0	0	0	0	0	61	2	59	15	0	0	0	0	0	23	5	16	11	22	6	2	54	0	0	0	1	0	7	0	2	0	0	0	0	0	0	32	0	0	0	0	0	318	0
490	16041.8	0	0	0	0	0	0	0	43	2	32	7	0	0	0	0	0	7	0	24	0	24	8	2	39	0	0	0	0	1	20	0	0	0	0	0	0	0	0	76	0	0	0	0	0	285	0
495	16279.9	0	0	0	0	0	0	0	125	2	37	1	0	0	0	0	0	5	1	11	0	17	7	4	62	0	0	0	0	1	8	0	0	0	0	0	0	0	0	11	0	0	0	0	0	292	0
500	16827.3	0	0	0	0	0	0	0	90	0	21	3	0	0	0	1	0	6	0	2	0	16	1	2	33	0	0	0	4	2	19	0	6	0	1	0	1	0	0	4	4	22	0	0	0	238	0
505	17452.2	0	0	0	0	0	0	0	59	0	32	3	0	0	0	0	0	11	0	6	0	8	3	1	59	0	0	0	0	2	9	0	0	0	0	0	3	0	0	2	3	7	1	0	0	209	0
510	18701.8	0	0	0	0	0	0	0	93	0	42	8	1	0	0	1	0	1	3	5	0	16	3	2	130	0	0	0	0	3	18	0	1	3	0	0	1	0	0	3	7	1	1	0	0	343	0
515	19326.6	0	0	0	0	0	0	0	58	0	33	13	0	0	0	1	0	4	0	6	0	17	1	0	51	0	0	1	0	2	8	0	1	1	0	0	2	0	0	9	8	0	0	0	0	216	0
520	19951.4	0	0	0	0	0	0	0	46	1	45	13	0	0	0	0	0	0	1	2	1	8	0	0	61	0	0	0	0	1	7	0	0	1	0	0	1	0	0	5	2	10	1	0	1	207	0
525	20576.2	0	1	0	0	0	0	0	0	1	14	16	0	0	0	0	0	1	1	0	0	6	0	0	8	0	0	0	1	0	3	0	0	0	0	0	0	0	0	2	4	18	1	0	0	77	0
530	21201	0	0	0	0	0	0	0	55	0	89	22	0	0	1	0	0	1	0	9	0	11	1	0	72	0	1	0	0	0	8	0	1	0	0	0	0	0	0	4	4	1	0	0	0	280	0
535	21825.8	0	0	0	1	0	0	0	21	3	31	9	0	0	0	0	0	0	0	4	0	9	1	1	50	0	1	0	0	0	5	0	1	3	0	0	0	0	0	3	8	0	0	0	0	151	0
540	22450.6	0	0	0	0	0	0	0	43	1	46	7	0	0	0	0	0	1	1	4	0	5	0	2	52	0	1	0	0	0	7	0	1	0	0	0	0	0	0	1	0	4	0	0	0	176	0
545	23075.5	2	2	0	0	0	0	0	67	0	70	16	0	0	0	3	0	3	0	5	0	16	1	1	77	0	0	0	4	0	13	0	2	0	0	0	0	0	0	5	0	18	0	0	8	313	0
550	23700.3	0	0	0	0	0	0	0	12	0	28	6	0	1	0	1	0	2	0	3	1	12	0	1	16	0	0	0	1	1	10	0	4	0	0	0	0	0	0	2	0	11	2	0	2	116	0
555	24325.1	0	0	0	0	0	0	0	7	2	103	18	0	0	0	2	0	2	0	5	0	10	0	0	116	0	0	0	1	0	13	0	2	0	0	0	0	0	0	7	0	7	0	0	2	297	0
560	24686.5	0	2	0	0	0	0	0	10	3	66	30	1	0	0	4	0	2	0	11	2	9	1	1	81	0	0	0	0	0	8	0	2	0	0	0	0	0	4	8	0	7	1	0	0	253	0
565	24872.4	0	0	0	0	0	0	0	10	5	61	23	1	2	0	2	0	1	1	16	2	7	1	2	61	0	0	0	0	0	10	0	1	0	0	0	0	0	0	9	5	7	0	0	0	227	0
570	25058.3	0	0	0	0	0	2	0	4	2	71	39	0	0	0	0	0	3	1	11	0	9	0	2	97	0	0	0	0	0	12	0	1	0	0	0	0	0	0	8	1	6	0	0	0	269	1
575	25244.1	0	1	0	0	0	0	0	6	2	84	84	0	1	0	2	0	4	1	15	2	9	1	2	77	0	0	0	3	0	3	0	1	0	0	0	0	0	1	23	0	2	0	0	0	324	1
580	25430	0	0	0	0	0	0	0	1	1	66	34	0	1	0	0	0	4	0	4	0	10	1	2	33	0	0	0	0	0	8	0	2	0	0	0	0	0	0	3	1	3	0	0	0	174	0
585	25615.9	0	0	0	0	0	0	0	3	3	80	28	1	0	0	0	0	3	1	12	0	4	0	0	47	0	1	0	10	0	9	0	0	0	1	0	0	0	0	8	0	5	0	0	0	216	1
590	25801.8	0	2	0	0	0	0	0	1	2	108	30	0	0	0	0	0	0	1	0	0	6	0	2	47	0	0	0	1	0	5	0	0	0	0	0	0	0	0	4	0	6	0	1	0	216	0
595	25987.6	0	0	0	0	0	0	0	4	1	252	16	0	0	0	1	0	0	1	3	1	8	0	1	51	0	0	0	4	0	7	0	2	0	0	0	0	0	0	2	0	6	0	1	0	361	0
600	26173.5	0	0	0	0	0	0	0	7	3	412	67	0	0	0	0	0	2	0	4	0	22	0	1	23	0	0	0	1	0	4	0	0	0	0	0	0	0	0	10	0	3	0	0	0	559	0
605	26359.4	0	0	0	0	0	0	0	3	0	39	8	0	0	0	0	0	1	0	2	0	6	0	0	46	0	0	0	1	0	4	0	0	0	0	0	0	0	0	2	0	5	1	0	0	118	1
610	26545.3	0	0	0	0	0	0	0	1	2	56	4	0	0	0	0	0	0	0	0	0	3	0	0	48	0	0	0	0	0	1	0	0	0	0	0	1	0	0	1	0	0	0	0	0	117	3
615	26731.1	0	0	0	0	0	0	0	3	2	31	6	0	0	0	0	0	1	0	0	0	7	1	0	19	0	2	0	1	0	6	0	1	0	0	0	0	0	0	0	0	2	0	0	0	82	1
620	26917	0	0	0	0	0	0	0	2	0	42	9	0	0	1	2	0	0	0	1	0	2	0	1	22	0	0	0	0	0	0	0	0	0	0	0	0	0	0	1	0	2	0	0	0	85	2
625	27124.7	0	0	0	0	0	0	0	7	2	283	31	0	0	0	2	0	1	0	5	4	15	0	0	101	0	0	1	3	0	6	0	0	0	0	0	0	0	1	2	9	0	0	0	0	473	1
635	27332.4	0	0	0	0	1	0	0	8	1	93	2	0	0	0	0	0	1	0	2	0	9	0	0	58	0	0	0	1	0	3	0	0	0	0	0	1	0	1	4	6	0	0	2	1	194	2
640	27540.1	0	1	0	0	0	0	0	11	0	61	1	0	0	1	3	0	1	0	0	0	3	1	0	34	0	0	0	4	0	2	0	0	0	0	0	0	0	0	3	0	0	0	0	0	126	3
645	27747.8	0	0	0	2	0	0	0	25	1	132	3	0	0	0	1	0	2	0	6	0	9	0	1	93	0	0	0	3	1	13	0	0	0	0	0	0	0	0	2	2	8	0	7	0	311	2
650	27955.5	0	0	0	0	0	0	0	6	3	21	0	0	0	0	1	0	0	0	1	0	5	0	0	55	0	1	0	5	0	1	0	0	1	0	0	0	0	0	2	0	5	0	0	1	108	0
655	28163.2	0	0	0	0	0	0	0	19	1	64	2	0	1	1	4	0	1	0	3	0	9	0	0	117	0	0	0	6	0	5	0	0	1	0	0	0	0	0	3	2	5	0	1	0	245	0
665	28370.9	0	1	0	0	0	0	0	15	1	82	0	0	0	0	1	0	0	0	0	0	9	0	0	86	0	0	0	2	0	5	0	0	0	0	0	0	0	0	0	0	1	0	0	0	203	0
675	28698.1	0	0	0	0	0	0	0	114	3	5	5	0	0	0	0	0	3	0	22	0	38	1	1	48	0	0	0	3	2	2	0	0	1	0	0	0	0	0	4	0	5	0	0	0	257	1
680	29511.9	0	0	0	0	0	0	0	41	1	4	5	0	0	0	0	0	0	0	1	0	10	0	0	37	0	1	0	3	0	0	0	0	0	0	0	0	0	0	1	0	1	0	0	0	105	1
685	29918.8	0	0	0	0	0	0	0	43	0	5	5	0	0	0	0	0	4	0	4	2	10	0	1	52	0	0	1	7	0	3	0	0	0	0	0	1	0	0	1	2	18	0	1	0	160	0
690	30325.6	0	0	0	0	0	0	0	9	1	3	1	0	0	0	0	0	0	0	0	0	0	0	0	22	0	0	0	1	0	2	0	0	1	0	0	0	0	0	0	0	1	0	0	1	42	1
695	30732.5	0	0	0	0	0	0	0	7	2	4	0	0	0	0	0	0	2	0	5	0	4	0	0	42	0	1	0	1	0	0	0	0	0	0	0	1	0	0	0	4	13	0	1	0	87	0
700	31139.4	0	0	0	0	0	0	0	5	0	7	0	0	0	0	0	0	0	0	5	0	8	0	0	20	0	0	0	0	0	8	0	0	1	0	0	0	0	0	0	10	5	0	0	1	70	1
711	31953.1	0	0	0	0	0	0	0	19	1	6	3	0	0	0	0	0	1	0	8	0	17	2	3	20	0	0	0	0	1	4	0	0	0	0	0	0	0	0	4	1	3	0	0	0	93	0
716	32766.9	0	0	0	0	0	0	0	15	3	3	5	0	0	0	0	0	0	0	12	0	25	1	0	33	0	0	0	3	0	7	0	0	0	0	0	1	2	0	1	1	2	0	0	1	115	1
721	33056.6	0	1	0	0	0	0	0	14	0	4	2	0	0	0	0	1	0	0	4	0	12	0	1	46	0	0	0	1	0	14	0	0	1	0	0	0	2	0	2	0	6	0	0	1	112	1
725	33170.7	0	0	0	0	0	0	0	15	4	3	3	0	0	0	0	0	3	0	8	0	10	0	0	65	0	0	1	5	0	9	0	0	0	0	0	0	0	5	0	20	7	0	2	1	161	1
727	33284.8	0	1	0	0	0	0	0	22	2	2	10	0	0	0	0	0	1	0	27	1	17	0	0	15	0	0	0	3	0	2	0	0	1	0	0	0	1	0	1	0	2	0	0	0	108	3
731	33398.9	0	0	0	0	0	0	0	13	0	7	0	0	0	0	0	0	0	0	1	0	10	1	0	22	0	1	0	0	1	0	0	0	0	0	0	1	3	0	1	0	1	0	0	0	62	2
736	33512.9	0	0	0	0	0	0	0	15	1	6	13	1	0	0	0	0	1	0	10	0	21	0	0	33	0	0	0	1	1	7	0	0	0	0	0	1	2	0	4	0	2	1	0	0	120	0
741	33763.9	0	0	0	0	0	0	0	6	0	3	14	0	0	0	0	0	0	0	5	0	11	0	1	33	0	0	0	0	0	1	0	0	0	0	0	0	4	0	5	0	0	0	0	0	83	3
747	33878	0	0	0	0	0	0	0	24	0	3	7	0	0	0	1	0	0	0	9	0	14	0	0	22	0	0	0	1	0	0	0	0	0	0	1	1	9	0	2	0	1	0	0	0	95	0
750	33992	0	1	0	0	0	0	0	7	1	4	1	0	0	0	0	0	0	2	2	0	2	0	0	56	0	1	0	2	0	2	0	0	1	0	0	0	0	2	0	10	0	0	0	0	94	0
751	34083.3	0	0	0	0	0	0	0	15	0	3	5	0	0	0	1	0	2	0	5	2	6	0	0	31	0	0	0	1	1	7	0	0	0	0	0	0	15	0	5	0	7	0	3	1	110	1
756	34128.9	0	0	0	0	0	0	0	23	0	3	4	0	0	0	0	0	0	0	3	0	6	0	1	48	0	0	0	1	0	4	0	0	0	0	0	0	33	0	2	0	2	0	1	0	131	1
761	34220.2	0	0	0	0	0	0	0	24	0	1	3	0	0	0	0	0	0	0	3	0	9	0	0	26	0	0	0	0	3	3	0	0	0	0	1	0	29	0	3	0	2	0	1	0	108	1
767	34334.3	0	0	0	0	0	1	0	35	4	17	8	0	0	0	0	1	0	0	5	1	12	0	0	16	0	0	0	0	0	4	0	1	0	0	0	0	10	0	8	0	1	0	0	1	125	3
771	34448.3	0	2	0	0	0	0	0	16	0	3	2	0	0	0	0	0	2	0	2	1	5	0	0	21	0	0	0	1	1	1	0	0	0	0	0	0	11	0	1	0	0	0	0	0	69	2
776	34585.2	0	0	0	0	0	0	0	40	1	4	2	0	0	0	0	0	0	0	6	4	5	0	0	16	0	0	0	1	2	3	0	0	0	0	0	1	16	0	0	0	2	0	0	0	103	0
781	34653.7	0	0	0	0	1	0	0	132	3	1	2	0	0	0	0	0	4	0	26	5	8	1	0	20	0	0	0	0	1	7	0	0	0	0	0	0	47	0	1	0	4	0	1	0	264	1
791	34676.5	0	1	0	0	0	0	0	60	1	0	3	0	0	0	0	0	0	0	2	1	3	0	0	19	0	0	0	0	0	7	0	0	0	0	0	0	26	0	0	0	2	0	0	0	125	1
796	34790.6	0	0	0	0	0	0	0	28	0	1	3	0	0	0	0	0	1	0	2	0	1	0	0	31	0	0	0	0	1	2	0	0	0	0	0	0	31	0	0	0	0	0	0	0	101	0
800	34904.6	0	0	0	0	0	0	0	71	0	0	3	0	0	0	0	0	1	0	10	1	4	0	0	47	0	0	0	0	1	6	0	0	1	0	0	1	21	0	0	0	1	0	0	0	168	1
805	35041.5	0	0	0	0	0	0	0	30	0	0	1	0	0	0	0	0	1	0	2	1	1	0	0	8	0	0	0	0	0	0	0	0	0	0	0	0	7	0	0	0	0	0	0	0	51	1
811	35132.8	0	0	0	0	0	0	0	63	3	0	1	0	0	0	0	0	0	0	11	0	4	0	0	10	0	0	0	0	2	6	0	0	0	0	0	0	16	0	0	1	4	0	0	0	121	2
816	35246.9	0	0	0	0	0	0	0	55	1	1	0	0	0	0	0	0	2	0	9	1	0	0	1	20	0	0	0	1	0	8	0	0	0	0	0	1	10	0	0	0	7	0	0	0	117	0
821	35360.9	0	1	0	0	0	0	0	79	0	0	2	0	0	0	0	0	1	0	9	1	2	0	0	12	0	0	0	0	0	9	0	0	0	0	0	0	29	0	0	1	2	0	0	0	148	0
827	35589.1	0	0	0	0	0	0	0	113	3	3	5	0	0	0	0	0	0	0	8	2	5	0	0	28	0	0	0	0	0	8	0	0	0	0	0	0	29	0	0	1	3	0	0	0	208	0
831	35703.2	0	1	0	0	0	0	0	93	1	1	1	0	0	0	0	0	0	0	5	0	0	0	0	20	0	0	0	0	0	3	0	0	0	0	0	0	18	0	0	0	0	0	0	0	143	2
836	35817.2	0	0	0	0	0	0	0	280	3	4	5	0	0	0	0	0	1	0	13	0	0	0	0	23	0	0	0	0	0	10	0	0	0	0	0	0	34	0	0	4	8	0	0	0	385	1
841	35908.5	0	0	0	0	0	0	0	525	0	5	3	0	0	0	1	0	0	0	3	2	1	0	0	9	0	0	0	0	0	1	0	0	1	0	0	0	26	0	0	0	0	0	0	1	578	1
847	36045.4	0	1	0	0	0	0	0	222	1	6	17	0	0	0	0	0	0	0	5	2	0	0	0	24	0	0	0	0	0	4	0	0	0	0	0	0	4	0	0	1	0	0	0	0	287	1
851	36159.5	0	1	0	0	0	0	0	179	0	7	9	0	0	0	0	0	0	0	6	0	1	0	0	41	0	0	0	1	0	4	0	0	0	0	0	0	2	0	0	1	0	0	0	0	252	1
857	36273.5	0	0	0	0	0	0	0	228	0	3	21	0	0	0	0	0	1	0	1	0	0	0	0	17	0	0	0	0	0	3	0	0	0	0	0	0	0	0	0	0	0	0	0	0	274	0
861	36387.6	0	1	0	0	0	0	0	71	0	2	14	0	0	0	0	0	0	0	2	0	0	0	0	53	0	0	0	0	0	3	0	0	0	0	0	0	2	0	0	0	0	0	0	0	148	0
867	36501.7	0	0	0	0	0	0	0	49	0	6	16	0	0	0	0	0	0	0	4	0	2	0	0	21	0	0	0	0	0	4	0	0	0	0	0	0	4	0	0	0	0	0	0	0	106	2
871	36615.8	0	1	0	0	0	0	0	23	1	4	6	0	0	0	0	0	0	0	9	1	2	0	0	9	0	0	0	0	0	0	0	0	0	0	0	0	0	0	0	0	0	0	0	0	56	1
881	36729.8	0	0	0	0	0	0	0	7	3	3	4	0	0	0	0	0	0	0	7	0	3	0	0	0	0	0	0	0	0	0	0	0	0	0	0	0	0	0	1	0	0	0	0	0	28	1
891	36866.7	0	1	0	0	0	0	0	12	1	7	7	0	3	0	0	0	0	0	10	1	3	0	0	9	0	0	0	0	0	3	0	0	0	0	0	0	3	0	0	1	2	0	0	1	64	5
896	36958	0	0	0	0	0	0	0	5	0	2	3	0	0	0	0	0	0	0	4	0	0	0	0	2	0	0	0	0	0	3	0	0	0	0	0	0	1	0	0	0	0	0	0	0	20	1
901	37137.7	0	0	0	0	0	0	0	17	1	6	5	0	0	0	0	0	0	0	9	0	1	0	0	2	0	0	0	0	0	0	0	0	0	0	0	0	0	0	0	0	0	0	0	0	41	1
905	37257.5	0	0	0	0	0	0	0	20	2	1	2	0	0	0	0	0	0	0	7	0	5	0	0	0	0	0	0	0	0	0	0	0	0	0	0	0	1	0	0	1	0	0	0	0	39	0
911	37437.2	0	0	0	1	0	0	0	9	2	1	1	0	0	0	0	0	0	2	11	0	4	0	0	0	0	0	0	0	0	0	0	0	0	0	0	0	0	0	1	0	0	0	0	0	32	2
921	37557.1	0	0	0	0	0	0	0	6	0	1	0	0	0	0	0	0	0	0	3	0	2	0	1	30	0	0	0	0	0	5	0	0	0	0	0	1	13	0	0	0	2	0	0	0	64	1
926	37856.6	0	0	0	0	0	0	0	6	2	3	5	0	0	0	0	0	0	0	14	1	9	0	0	23	0	0	0	0	0	3	0	0	0	0	0	0	4	0	3	0	0	0	0	1	74	2
931	38156.1	0	1	0	0	0	0	0	14	4	6	3	0	1	0	0	1	0	0	17	0	3	0	0	50	1	0	0	0	0	7	0	0	0	0	0	0	8	0	2	0	1	0	0	1	120	1
936	38305.9	0	0	0	0	0	0	0	3	0	2	2	0	0	0	0	0	0	0	11	0	1	0	0	6	0	0	0	0	0	2	0	0	0	0	0	0	0	0	0	0	0	0	0	0	27	1
941	38455.7	0	0	0	0	0	0	0	6	1	5	5	0	0	0	0	0	0	0	16	0	2	0	0	17	0	0	0	0	0	1	0	0	0	0	0	0	1	0	2	0	0	0	0	0	56	2
952	38575.5	0	0	0	0	0	0	0	12	10	6	23	0	0	0	0	0	0	0	34	1	11	0	0	29	0	0	0	0	1	3	0	0	0	0	0	0	1	0	32	0	0	0	0	0	163	0
956	38755.2	0	2	0	0	0	0	0	2	5	4	3	0	0	0	0	0	0	0	17	0	1	0	0	21	0	0	0	0	1	2	0	0	0	0	0	0	0	0	3	0	0	0	0	0	61	1
961	39190.3	0	0	0	0	0	0	0	16	21	26	5	0	0	0	0	0	4	1	36	1	16	1	1	37	0	0	0	0	0	8	0	0	0	0	0	0	1	0	57	2	0	0	0	0	233	1
966	39453.1	0	0	0	1	0	0	0	8	4	9	6	0	0	0	1	0	1	0	15	3	7	0	0	33	0	0	0	0	0	6	1	0	2	0	0	0	2	0	8	1	0	0	0	0	108	1
971	39715.9	0	0	0	0	0	0	0	10	6	1	2	0	0	0	0	0	0	1	34	3	12	0	0	14	0	0	0	0	0	2	0	0	0	0	0	0	0	0	7	0	0	0	0	0	92	0
976	39978.6	0	0	0	0	0	0	0	6	7	4	2	0	0	0	0	0	1	0	31	1	3	0	0	6	0	0	0	0	0	3	0	0	0	0	0	0	0	0	3	1	0	0	0	0	68	0
981	40241.4	0	0	0	0	0	0	0	2	13	6	9	0	1	0	0	0	0	0	30	2	8	1	0	9	0	0	0	1	0	12	0	0	0	0	0	0	2	0	3	0	0	0	0	0	99	2
986	40819.5	0	0	0	1	0	0	0	8	6	4	6	0	0	0	1	0	0	0	20	0	7	0	0	21	0	0	0	0	0	4	0	0	0	0	0	0	0	0	0	0	1	0	2	0	81	0
993	41029.7	0	0	0	0	0	0	0	9	2	0	6	0	0	0	0	0	0	0	18	0	4	1	0	5	0	0	0	0	1	1	0	0	1	0	0	0	3	0	0	0	0	0	0	0	51	0
1001	41292.4	0	0	0	0	0	0	0	10	8	0	2	0	0	0	0	0	0	0	9	1	5	0	1	14	0	0	0	0	0	5	0	0	0	0	0	0	1	0	2	0	2	0	0	0	60	1
1006	41592.3	0	3	0	0	0	0	0	28	7	1	4	0	0	0	0	0	0	0	40	1	7	0	0	11	0	0	0	1	0	6	0	0	0	0	0	0	1	0	1	0	1	0	0	0	112	3
	41901.5
	42210.7
	42519.8
	42829
	43243.5
	43591.9
	43809.7

## Sheet: %
Depth (cm)	Age ka cal. BP	Bitectatodinium tepikiense	Impagidinium aculeatum	Impagidinium paradoxum	Impagidinium patulum	Impagidinium sphericum	Impagidinium strialatum	Impagidnium spp	Lingulodinium machaerophorum	Nematosphaeropsis labyrinthus	Operculodinium centrocarpum	Operculodinium israelianum	Operculodinium janduchenei	Operculodinium aguinawense	Operculodinium spp	Polysphaeridium zoharyi	Pyxidinopsis reticulata	Spiniferites membranaceus	Spiniferites pachydermus	Spiniferites ramosus	Spiniferites bentorii	Spiniferites mirabilis	Spiniferites spp	Pentapharsodinium dalei	Brigantedinium spp	Protoperidinium spp.	Lejeunecysta sabrina	Lejeunecysta oliva	Selenopemphix nephroides	Xandarodinium xanthum	Selenopemphix quanta	Stelladinium reidii	Trinovantedinium applanatum	Votadinium calvum	Votadinium spinosum	Protoperidinium americanum	Quinquecuspis concreta	Polykrikos schwartzii	Polykrikos kofoidii	Tuberculodinium vancampoae	Echinidinium spp	Echinidinium aculeatum	Echinidinium granulatum	Echinidinium delicatum	Echinidinium transparentum	TOTAL
0	1465.04	0	0	0	0	0	0	0	6.94981	0	77.2201	0.3861	0	0	0	0	0	3.0888	1.5444	0	0.3861	0.772201	0	0.772201	1.9305	0	0	0	0	0	0	0	0	0	0	0	0	0	0	0	3.0888	1.5444	0.772201	1.1583	0.3861	100
5	1614.02	0	0.227273	0	0	0	0	0	4.09091	0.227273	80	0.909091	0.227273	0	0	0	0	0.454545	1.59091	0	0	0.454545	0	0	3.40909	0	0.227273	0	0.227273	0	0.909091	0	0	0	0	0	0	0	0	0.227273	0.909091	2.95455	0.681818	2.27273	0	100
10	1763	0	0.18622	0	0	0	0	0	3.16574	0.372439	80.4469	0	0	0	0	0	0	0.744879	2.23464	0.18622	0	0.558659	0	0.18622	4.46927	0	0	0	0.744879	0	1.11732	0	0	0	0	0	0	0	0	0.18622	1.67598	0.931099	0.744879	1.48976	0.558659	100
15	1911.98	0	0	0	0	0	0	0	1.04712	1.04712	73.5602	1.04712	0.26178	0	0	0.26178	0	1.57068	2.09424	0.26178	0.26178	0.78534	0.26178	0.26178	4.97382	0	0	0	0.52356	0.26178	1.83246	0	0	0.52356	0	0	0	0.78534	0	0.78534	1.04712	0.78534	1.04712	3.9267	0.78534	100
20	2060.96	0	0	0	0	0	0	0	0.2331	1.1655	72.9604	0.2331	0	0	0	0	0	1.6317	5.12821	0.2331	0.4662	0.699301	0	0.2331	3.7296	0	0	0	1.3986	0	0.932401	0	0.4662	0	0	0	0	0	0	0.699301	0	1.3986	2.5641	5.12821	0.699301	100
25	2209.94	0	0	0	0.165289	0	0	0	0.165289	1.15702	82.8099	0.661157	0	0.495868	0	0	0	0.991736	7.93388	0.330579	0.330579	0.826446	0.330579	0.330579	0.495868	0	0	0	0.826446	0	0.330579	0	0	0	0	0	0	0	0	0	0.826446	0	0.165289	0.826446	0	100
30	2358.92	0	0	0	0	0	0	0	0.243309	1.45985	74.6959	0.729927	0	0	0	0	0	1.21655	5.3528	0	0.486618	0.486618	0.486618	0	3.89294	0	0	0	0.729927	0	2.18978	0	0	0.243309	0	0	0	0	0	0	0.243309	1.21655	1.70316	4.13625	0.486618	100
35	2507.9	0	0	0	0.208768	0	0	0	0.208768	0.835073	75.7829	0.417537	0	0	0	0	0	2.08768	9.60334	0.208768	0.626305	0.626305	0.626305	0	2.92276	0	0	0	0.626305	0	0.626305	0	0	0.208768	0	0	0	0	0	0.626305	0.626305	0	0.417537	2.71399	0	100
40	2656.88	0	0	0	0	0	0	0	0.13369	1.3369	68.984	0.534759	0.13369	0	0	0	0.26738	1.47059	18.3155	0.13369	0.534759	0.26738	0.802139	0.13369	2.54011	0	0	0	0.802139	0	0.668449	0	0	0	0	0	0	0	0	0.26738	0.13369	0	0.13369	2.13904	0.26738	100
45	2805.86	0	0	0	0	0	0	0	0.143885	1.15108	66.3309	0.719424	0	0	0	0	0.143885	2.58993	19.1367	0.143885	0.143885	1.15108	1.8705	0.143885	3.45324	0	0	0	0.719424	0	0.719424	0	0.143885	0	0	0	0	0	0	0	0.431655	0	0	0.863309	0	100
50	2954.84	0	0	0	0.162602	0	0	0	0.162602	1.30081	67.4797	0.487805	0	0	0	0	0	0.650407	21.1382	2.11382	0.97561	0.162602	0.97561	0	2.60163	0	0	0	0.650407	0	0.325203	0	0.162602	0	0	0	0	0	0	0.162602	0	0	0	0.487805	0	100
55	3103.82	0	0	0	0	0	0	0	0.178571	1.96429	68.3929	0.535714	0	0	0	0	0	2.85714	16.25	0.178571	0.178571	0.357143	1.25	0	4.28571	0	0	0	0.357143	0	0.892857	0	0	0.178571	0	0	0	0	0	0	0	0	0	1.60714	0.535714	100
60	3252.8	0	0	0	0	0	0	0	0	1.08696	76.3975	0.15528	0	0	0	0	0	2.63975	12.5776	0	0	0.310559	1.39752	0	2.01863	0	0.15528	0	0.310559	0	0.465839	0	0	0	0	0	0	0	0	0.310559	0	0	0.310559	1.86335	0	100
65	3401.78	0	0	0	0	0	0	0	0.322581	0.967742	74.1935	0.483871	0.16129	0.16129	0	0	0	1.6129	16.9355	0	0	1.45161	0.483871	0	0.483871	0	0	0	0.483871	0	0.322581	0	0	0.16129	0	0	0	0	0	0.16129	0.322581	0	0.322581	0.806452	0.16129	100
70	3550.76	0	0	0	0	0	0	0	0.201207	0.201207	59.9598	0.201207	0.402414	0.201207	0	0	0	3.42052	24.5473	0.804829	1.40845	0.804829	2.01207	0.402414	2.61569	0	0.402414	0	0	0	0.603622	0	0	0	0	0	0	0.201207	0	0.201207	0	0.402414	0.402414	0.603622	0	100
75	3699.75	0	0	0	0	0	0	0	0.227273	1.59091	43.6364	0.909091	0	0	0	0	0	0.454545	46.5909	0.227273	0	0.909091	1.59091	0	1.81818	0	0.227273	0	0.227273	0	0.681818	0	0	0.227273	0	0	0	0	0	0	0.454545	0	0	0.227273	0	100
80	3848.73	0	0.223214	0	0	0	0	0	0.669643	0.223214	60.9375	0.446429	0.223214	0	0	0	0	1.78571	22.0982	0.446429	0	2.23214	1.11607	0	3.57143	0	0	0	0	0	1.33929	0	0	0.223214	0	0	0	0	0	0.669643	0	0.446429	0.669643	2.45536	0.223214	100
85	3997.71	0.331126	0	0	0	0	0.331126	0	0.662252	1.65563	51.6556	0.331126	0	0	0.331126	0.331126	0	3.64238	19.8675	0.993377	0	2.64901	0.662252	0	6.29139	0	0	0	1.3245	0	1.98675	0	0	0.331126	0	0	0	0	0	1.65563	0.662252	0.331126	0.331126	3.31126	0.331126	100
90	4146.69	0	0	0	0	0	0	0	1	2.5	11.5	0	0	0	0	0	0	12.5	17	0.5	0	6	1	0	33	0	0	0	2	0	1.5	0.5	0	1	0	0	0	1	0	1	0	3	0	3.5	1.5	100
95	4295.67	0	0	0	0	0	0	0	2.5974	1.94805	29.8701	0.649351	0	0.649351	0	0	0	3.24675	20.1299	1.94805	1.2987	5.19481	0	0	19.4805	0	0	0	0	0	1.94805	0	0	1.2987	0	0	0	0.649351	0	1.2987	4.54545	0	1.2987	1.94805	0	100
100	4444.65	0	0	0	0	0	0	0	1.33333	0	16	1.33333	0	0	1.33333	0	0	2.66667	44	2.66667	0	5.33333	0	0	13.3333	0	0	0	2.66667	0	2.66667	0	0	0	0	0	0	1.33333	0	0	4	0	0	1.33333	0	100
105	4593.63	0	0	0	0	1.53846	0	0	1.53846	0	16.9231	1.53846	0	0	0	0	0	1.53846	43.0769	0	0	1.53846	3.07692	0	26.1538	0	0	0	0	0	3.07692	0	0	0	0	0	0	0	0	0	0	0	0	0	0	100
110	4742.61	0	0	0.353357	0.353357	0	0	0	0.706714	1.06007	35.3357	1.41343	0	0	0.706714	0.353357	0	3.88693	16.2544	1.06007	0.353357	4.59364	1.06007	0	14.841	0	0	0	2.4735	0	3.53357	0	0	0	0	0	0	0.706714	0	1.06007	0	2.12014	0	4.947	2.82686	100
120	4891.59	0	0.763359	0	0	0	0	0	1.52672	0.763359	16.7939	2.29008	0	0	0	0	0	4.58015	0	0.763359	0	5.34351	0.763359	0.763359	44.2748	0.763359	0	0	0	0	4.58015	0.763359	0	0	0	0	0	0	0	0.763359	0.763359	2.29008	4.58015	5.34351	1.52672	100
125	5040.57	0	0	0	0	0	0.840336	0	0.840336	0.840336	47.0588	0.840336	0	0.840336	0	0	0	2.52101	7.56303	0	0	6.72269	0.840336	0	17.6471	0	0	0	5.88235	0	5.88235	1.68067	0	0	0	0	0	0	0	0	0	0	0	0	0	100
130	5189.55	0	0	0	0	0	0	0	0.847458	7.62712	38.9831	2.54237	0	0	0	0.847458	0	0.847458	0	0.847458	1.69492	1.69492	0	0	25.4237	0	0	0	0	0	0.847458	0	0	0	0	0	0	0	0	1.69492	16.1017	0	0	0	0	100
135	5338.53	0	0	0	0	0	0	0	1.36986	1.36986	49.3151	0	0	0	1.36986	0	0	1.36986	2.73973	0	1.36986	4.10959	0	0	28.7671	0	1.36986	0	4.10959	0	1.36986	0	0	0	0	0	0	0	0	0	0	0	0	1.36986	0	100
140	5487.51	0	0	0	0	0	0	0	0	8.58896	46.0123	0.613497	0.613497	0	0	0	0	3.68098	0	0.613497	0	1.22699	0.613497	2.45399	20.8589	0	0	0.613497	1.22699	0	0.613497	0	0	0	0	0	0	0	0	1.22699	11.0429	0	0	0	0	100
145	5636.49	0	0	0	0	0	0	0	1.19048	1.19048	57.1429	1.19048	0	0	0	0	0	2.38095	1.19048	0	0	1.19048	0	0	25	0	0	0	1.19048	0	2.38095	1.19048	0	0	0	0	0	0	0	2.38095	1.19048	1.19048	0	0	0	100
150	5785.47	0	0	0	0	0	0	0	0	3.37079	69.1011	1.1236	0.561798	0	0	0	0	1.68539	0	1.1236	0.561798	0.561798	0	0.561798	10.1124	0	0	0	0.561798	0	0.561798	0	0	0	0	0	0	0	0	0	10.1124	0	0	0	0	100
155	5934.45	0	0	0	0	0	0	0	5	0	46.6667	1.66667	0	1.66667	1.66667	0	0	1.66667	0	1.66667	1.66667	6.66667	0	0	23.3333	0	0	0	0	0	3.33333	0	0	0	0	0	0	0	0	1.66667	1.66667	0	0	1.66667	0	100
160	6083.43	0	0	0	0	0	0	0	1.19048	2.38095	50.5952	1.19048	0	2.38095	0.595238	0	0	1.78571	0	0	0.595238	5.35714	0	0	24.4048	0	0.595238	0	1.19048	0	1.19048	1.78571	0	0	0	0	0	0	0	0	0	0.595238	0.595238	3.57143	0	100
170	6232.41	0	0	0	0	0	0	0	1.90476	0	11.4286	2.85714	0	2.85714	2.85714	0	0	8.57143	0.952381	0	0	6.66667	0.952381	0	38.0952	0	0	0	0	0	1.90476	5.71429	0	0.952381	0	0	0	0	0	0.952381	5.71429	0.952381	1.90476	4.7619	0	100
175	6381.39	0	0	0	0	0	0	0	3.07692	0	47.6923	0	0	0	0	0	0	3.07692	0	4.61538	0	3.07692	3.07692	0	16.9231	0	0	0	4.61538	0	9.23077	0	0	1.53846	0	0	0	0	0	0	1.53846	1.53846	0	0	0	100
180	6530.37	0	0	0	0	0	0	0	0.990099	0	6.93069	0	0	0.990099	0	0	0	2.9703	0	0.990099	0	3.9604	0.990099	0	46.5347	0	0	0.990099	2.9703	0	2.9703	12.8713	0	0	0	0	0	0	0	0	0.990099	6.93069	0	6.93069	0.990099	100
190	6679.35	0	0	0	0	0	0	0	1.81818	0	0	2.72727	0	0	0	0	0	8.18182	0	0	0	4.54545	0	0	44.5455	0	0	0	2.72727	0	2.72727	5.45455	0	0.909091	0	0	0	0	0	0.909091	11.8182	9.09091	0.909091	0.909091	2.72727	100
195	6828.33	0	0	0	0	0	0	0	0	0	12.2449	0	0	0	0	0	0	1.02041	1.02041	0	0	5.10204	1.02041	0	47.9592	0	0	0	12.2449	1.02041	4.08163	7.14286	1.02041	1.02041	0	0	0	0	0	0	2.04082	0	2.04082	1.02041	0	100
200	6977.31	0	0	0	0	0	0	0	2.17391	3.26087	29.3478	2.17391	1.08696	1.08696	1.08696	2.17391	0	2.17391	4.34783	0	1.08696	4.34783	3.26087	0	17.3913	0	0	0	2.17391	1.08696	1.08696	1.08696	0	0	0	0	0	0	0	2.17391	8.69565	4.34783	1.08696	3.26087	0	100
205	7126.29	0	0	0	0	0	0	0	2.5	0	3.75	0	0	1.25	0	1.25	0	8.75	2.5	0	0	6.25	0	0	40	0	0	0	1.25	2.5	5	10	0	0	0	0	0	0	0	0	7.5	1.25	3.75	0	2.5	100
210	7275.27	0	0	0	0	0	0	0	0.819672	0	1.63934	0.819672	0	1.63934	0	1.63934	0	6.55738	0	0.819672	0	7.37705	0	0	43.4426	0	4.91803	0	0.819672	0	4.91803	4.09836	0	0	0	0	0	0	0	0	4.09836	4.91803	4.09836	7.37705	0	100
215	7424.25	0	0	0	0	0	0	0	1.51515	0	0	1.51515	0	0	1.51515	0	0	1.51515	0	1.51515	0	6.06061	0	0	65.1515	0	0	0	0	1.51515	1.51515	7.57576	0	0	0	0	0	0	0	0	6.06061	3.0303	1.51515	0	0	100
220	7573.24	0	0	0	0	0	0	0	2.0202	1.0101	0	1.0101	0	0	2.0202	0	0	2.0202	0	0	0	0	1.0101	0	64.6465	0	0	0	4.0404	1.0101	2.0202	9.09091	0	0	0	0	0	0	0	0	2.0202	0	2.0202	6.06061	0	100
225	7722.22	0	0	0	0	0	0.78125	0	3.90625	5.46875	7.8125	0.78125	0	0	3.125	0.78125	0.78125	4.6875	0	2.34375	1.5625	3.125	1.5625	4.6875	33.5938	0	0	0	1.5625	0.78125	3.125	7.03125	0	0	0	0	0	0	0	0.78125	11.7188	0	0	0	0	100
230	7871.2	0	1.69492	0	0	0	0	0	0.847458	0.847458	1.69492	0	0	0	0	0	0	5.08475	0	2.54237	0	4.23729	0.847458	0	49.1525	0	0	0	0.847458	0	5.9322	14.4068	0	0	0	0	0	0	0	0	8.47458	0.847458	1.69492	0.847458	0	100
240	8020.18	0	0	0	0	0	0	0	1.06952	0.534759	1.06952	0	0	0	0.534759	0	0	2.6738	0.534759	1.60428	0.534759	5.88235	0.534759	0	59.893	0	0	0	2.13904	0	3.20856	11.2299	0	0.534759	0	0	0	0	0	0	3.74332	0.534759	0	3.74332	0	100
250	8169.16	0	0	0	0	0	0	0	0.840336	1.68067	0.840336	0.840336	0	0	1.68067	0	0	0.840336	0	0	0	2.52101	2.52101	0	76.4706	0	0	0	0.840336	0	1.68067	3.36134	0	0.840336	0	0	0	0	0	0	4.20168	0	0.840336	0	0	100
260	8318.14	0	0	0	0	0	0	0	0.775194	0.775194	0	0	0	0	0.775194	0	0	3.87597	0	0.775194	0	1.55039	0.775194	0	61.2403	0	0.775194	0	1.55039	1.55039	3.87597	12.4031	0	0	0	0	0	0	0	0	5.42636	0.775194	0.775194	1.55039	0.775194	100
265	8467.12	0	0	0	0	0	1.51515	0	1.51515	1.51515	1.51515	0	0	0	0	0	0	7.57576	0	1.51515	0	6.06061	0	1.51515	46.9697	0	0	0	1.51515	0	1.51515	16.6667	0	0	0	0	0	0	0	0	6.06061	1.51515	1.51515	1.51515	0	100
270	8616.1	0	0	0	0	0	0	0	0.847458	0.847458	0.847458	0	0	0	0.847458	0	0	1.69492	0	0.847458	0.847458	2.54237	0	0	60.1695	0	0	0.847458	0.847458	0	2.54237	11.0169	0	0	0	0	0	0	0	0	7.62712	2.54237	1.69492	3.38983	0	100
280	8765.08	0	0	0	0	0	0	0	0.662252	0	6.62252	0.662252	0	0	0.662252	0	0	5.29801	0.662252	0	0.662252	8.60927	1.3245	0	34.4371	0	0	0	1.3245	3.31126	1.3245	17.2185	0.662252	0	0	0	0.662252	0	0	0	6.62252	4.63576	0.662252	3.97351	0	100
285	8914.06	0	0	0	0	0	0	0	0	0	7.46269	0	0	0	0	0	0	0	0	1.49254	0	4.47761	0	0	43.2836	0	0	0	5.97015	2.98507	7.46269	7.46269	0	0	0	0	0	0	0	0	7.46269	7.46269	0	4.47761	0	100
290	9063.04	0	0.37594	0	0	0	0	0	1.12782	0	3.00752	1.50376	0	0	0	0	0	3.00752	0	0.75188	0	6.39098	0.75188	0	50.7519	0	0	0.37594	1.50376	1.8797	0.75188	21.4286	0	0	0	0	0	0	0	0	1.8797	0	0	4.51128	0	100
295	9212.02	0	0	0	0	0	0	0	1.17647	2.35294	0	1.17647	0	0	0	0	0	2.35294	0	0	0	3.52941	0	0	42.3529	0	0	0	2.35294	4.70588	2.35294	11.7647	0	1.17647	0	0	1.17647	0	0	0	12.9412	0	1.17647	8.23529	1.17647	100
300	9361	0	0	0	0	0	0	0	0	1.66667	1.66667	1.66667	0	1.66667	2.5	0	0	0	0	0.833333	0	9.16667	0.833333	0.833333	54.1667	0	0	0	2.5	0	0.833333	10.8333	0	0	0	0	0	0	0	0	10	0	0	0.833333	0	100
305	9542.32	0	0	0	0	0	0	0	0	1.42857	0	1.42857	0	1.42857	2.85714	1.42857	0	0	0	1.42857	1.42857	7.14286	0	0	44.2857	0	1.42857	0	2.85714	0	7.14286	4.28571	0	0	0	0	1.42857	1.42857	0	0	15.7143	0	1.42857	1.42857	0	100
310	9723.63	0	0	0	0	0	0	0	1.5625	0	0.78125	2.34375	0	0	0	0	0	2.34375	0	0	0	7.8125	0	0	58.5938	0	0	0.78125	4.6875	1.5625	4.6875	5.46875	0	0.78125	0	0	0	0	0	0	3.90625	0	2.34375	2.34375	0	100
315	9904.95	0	0	0	0	0	0	0	0	1.2987	0	0	0	0	2.5974	0	0	5.19481	0	0	0	11.6883	0	0	44.1558	0	0	0	7.79221	0	0	7.79221	0	0	0	0	0	0	0	0	14.2857	0	0	3.8961	1.2987	100
320	10086.3	0	0.367647	0	0.367647	0	0	0	0	0.367647	2.20588	0.735294	0	0	0	0	0	2.94118	0.367647	0	0.367647	2.94118	0	0	61.7647	0	1.10294	0	2.57353	0.367647	5.14706	3.30882	0	0	0	0	1.47059	0	0	0	9.92647	0	1.83824	1.83824	0	100
330	10267.6	0	0.735294	0	0	0	0	0	0	0	1.47059	0	0	0	0	0	0	2.94118	0	0.735294	0	4.41176	0	0	61.7647	0	0	0	2.94118	0.735294	8.08824	1.47059	0	0	0	0	0	0	0	0	10.2941	0	3.67647	0.735294	0	100
335	10448.9	0	1.06383	0	0	0	0	0	2.12766	1.06383	0	1.06383	0	0	0	0	2.12766	1.06383	0	0	0	3.19149	0	1.06383	39.3617	0	0	0	4.25532	0	10.6383	2.12766	0	0	0	0	0	0	0	0	23.4043	0	2.12766	5.31915	0	100
340	10630.2	0	0	0	0	0	0	0	1.14286	0	2.28571	1.71429	0	0	0.571429	0	0	2.85714	0.571429	1.14286	0.571429	2.28571	0	0	61.1429	0	0.571429	0	1.71429	0	5.71429	1.14286	0	0	0	0	0.571429	1.14286	0	1.14286	8.57143	0	0.571429	3.42857	1.14286	100
345	10811.5	0	0	0	0	0	0	0	1.17647	0	1.17647	1.17647	0	0	0	0	0	2.35294	0	0	0	3.52941	0	0	60	0	0	0	1.17647	1.17647	4.70588	1.17647	0	0	0	0	0	2.35294	0	2.35294	10.5882	0	3.52941	3.52941	0	100
350	10992.8	0	0	0	0	0	0	0	4.42478	0	5.30973	3.53982	0	0	0	0	0	0.884956	0	0.884956	0	1.76991	0	0	65.4867	0	0	0	2.65487	0	5.30973	0	0	0	0	0	1.76991	0	0	0	7.07965	0	0	0.884956	0	100
355	11174.2	0	0	0	0	0	0	0	3.52941	0	3.52941	2.35294	0	0	1.17647	0	0	4.70588	0	0	0	1.17647	0	1.17647	37.6471	0	0	0	2.35294	1.17647	10.5882	0	0	0	0	0	0	2.35294	0	1.17647	17.6471	0	4.70588	3.52941	1.17647	100
360	11355.5	0	0	0	0	0	0	0	2.98507	0.746269	4.47761	2.98507	0	0	1.49254	0	0	0.746269	0	2.23881	0	0.746269	2.98507	0	50	0	0	0	0.746269	3.73134	5.97015	3.73134	0	0.746269	0	0	1.49254	0	0	0	8.95522	0	3.73134	1.49254	0	100
365	11666.9	0	0	0	0	0	0.729927	0	0	0.729927	0.729927	3.64964	0	0	0	0	0	0	0	0	0.729927	3.64964	0	0	54.0146	0	0	0	2.18978	0	2.91971	2.18978	0	0	0	0	0.729927	0.729927	0	0.729927	9.48905	0	7.29927	8.0292	1.45985	100
370	11816.3	0	0	0	0.558659	0	0	0	2.7933	0.558659	1.67598	3.35196	0	0	0	0.558659	0	2.23464	0	0	0	1.67598	0	1.67598	50.838	0	0.558659	0	1.67598	0.558659	0.558659	0	0	0	0	0	0	0	0	0	20.1117	0	2.23464	7.26257	1.11732	100
375	11965.6	0	0.294118	0	0	0	0	0	28.8235	1.17647	22.3529	6.76471	0.294118	0	0.882353	0.882353	0	2.05882	0	1.17647	0.588235	4.11765	0	0.294118	18.2353	0	0	0	0	0	2.94118	0	0.294118	0	0	0	0	0	0	1.76471	3.82353	0	0	0.882353	2.35294	100
380	12115	0	0	0	0	0	0	0	0.492611	0.985222	2.95567	1.47783	0	0	0.492611	0	0	0.492611	0	0	0.492611	3.44828	0.492611	0.492611	52.7094	0	0	0	0.985222	0.492611	2.95567	11.8227	0	0.492611	0	0	0	0	0	0.492611	11.8227	0	1.47783	4.92611	0	100
385	12264.3	0	0	0	0	0	0	0.666667	2	1.33333	4	3.33333	0	0	0.666667	0.666667	0	0.666667	0	2	0	5.33333	0	0	32.6667	0	0	0	0	0.666667	4	4.66667	0	0	0	0	0.666667	2.66667	0	0.666667	22.6667	0	6.66667	4	0	100
390	12413.6	0	0.552486	0	0	0	0	0	2.76243	2.20994	2.76243	2.20994	0	0	1.65746	0	0	1.10497	0	0	0	2.76243	0	0	51.9337	0	0	0	3.8674	0	3.31492	1.65746	0	0	0	0	0	0	0	0	16.5746	0	2.76243	3.8674	0	100
395	12594.1	0	0	0	0	0	0	0	3.94737	3.94737	5.26316	0	0	0	0	0	0	1.31579	0	0	0	1.31579	0	0	53.9474	0	0	0	1.31579	0	3.94737	9.21053	0	0	0	0	0	0	0	0	9.21053	0	2.63158	3.94737	0	100
400	12782.3	0	0	0	0	0	0	0	1.21951	0	8.53659	3.04878	0	0	0.609756	0.609756	0	0	0	0	0	1.82927	0.609756	0	63.4146	0	0	0	0.609756	0.609756	3.04878	4.26829	0	0	0	0	0	0	0	0	11.5854	0	0	0	0	100
415	12970.5	0	0	0	0	0	0	0	2.41546	0	6.76329	5.31401	0	0	1.44928	0	0.966184	1.93237	0.483092	0.966184	0	1.44928	0	0	37.1981	0	0	0	0.483092	0	3.38164	10.1449	0	0.483092	0	0	0	0.483092	0	1.44928	16.9082	0	3.38164	3.86473	0.483092	100
420	13158.7	0	0	0	0	0	0	0	2.60586	0.325733	7.81759	5.21173	0	0	0.977199	0	0.325733	1.30293	0.651466	0.651466	0	1.9544	0.325733	0.651466	34.202	0	0	0	0.325733	0	2.60586	2.60586	0	0	0	0	0.325733	0	0	0	28.6645	0	2.28013	5.53746	0.651466	100
425	13346.9	0	0	0	0	0	0	0	4.34783	3.26087	8.69565	5.43478	0	2.17391	0	0	1.08696	0	0	2.17391	0	15.2174	0	1.08696	28.2609	0	0	0	1.08696	1.08696	2.17391	0	0	0	0	0	1.08696	0	0	1.08696	4.34783	7.6087	4.34783	4.34783	1.08696	100
430	13535.1	0	0	0	0	0	0	0	11.5385	0.320513	17.9487	5.76923	0	0	1.60256	0	0	3.52564	0.961538	0.641026	0.320513	1.92308	0.320513	0.320513	29.8077	0	0	0	0	0.320513	1.92308	6.08974	0.320513	0	0	0	0	0	0	2.24359	14.1026	0	0	0	0	100
435	13723.3	0	0	0	0	0	0	0	4.51128	3.00752	22.5564	12.0301	0.75188	0	1.50376	0.75188	1.50376	3.7594	0	0	0	0	0	0.75188	30.0752	0	0	0	0.75188	0.75188	2.25564	0.75188	0	0	0	0	0	0	0	0	14.2857	0	0	0	0	100
440	13911.5	0	0.232019	0	0	0	0	0	4.40835	0.464037	39.9072	13.4571	0	0.696056	0.232019	0	0	0.464037	0	1.16009	0	3.7123	0	0.232019	26.2181	0	0	0	0.464037	0	1.16009	0	0.232019	0	0	0	0.232019	0.232019	0	1.62413	0	0	0	3.7123	1.16009	100
445	14099.8	0	0	0	0	0	0	0	1.40449	0.561798	47.4719	15.4494	0	0	0.280899	0	0	0.842697	0	0	0	0.842697	0	1.40449	24.7191	0	0	0	1.1236	0	3.08989	0	0	0.280899	0	0	0	0	0	0.842697	1.68539	0	0	0	0	100
450	14664.4	0	0	0.309598	0.309598	0	0	0	2.16718	0.309598	37.7709	40.8669	0	0	0.928793	0.309598	0	0	0.309598	0.619195	0.309598	1.85759	0.619195	0.619195	10.2167	0	0	0	0.619195	0	0	0	0	0	0	0	0	0	0	0.928793	0.928793	0	0	0	0	100
455	14852.6	0	0.27933	0	0	0	0	0	3.63128	2.51397	59.2179	6.14525	0	0	0	0.558659	0	1.67598	0	0.558659	0	1.39665	0	1.39665	17.3184	0	0	0	0	0.27933	0.558659	0	0.558659	0	0	0	0	0	0	1.67598	2.23464	0	0	0	0	100
460	15040.8	0	0.316456	0	0	0	0.632911	0	7.27848	1.58228	55.6962	3.16456	0	0	0.316456	1.89873	0	1.58228	0.316456	1.89873	0	2.53165	0	0.316456	16.1392	0	0	0	0.316456	0.316456	2.21519	0	0	0	0	0	0	0	0	1.58228	1.89873	0	0	0	0	100
465	15229	0	0	0	0	0	0.327869	0	17.0492	3.60656	26.2295	6.88525	0	0	0	0.327869	0	1.63934	0.655738	1.63934	0.983607	4.59016	1.31148	0	21.3115	0	0	0	0.983607	0	0.327869	0	0.327869	0	0	0	0	0.327869	0	5.90164	5.57377	0	0	0	0	100
475	15417.2	0	0	0	0	0	0	0.3003	11.7117	2.4024	23.1231	3.9039	0	0	0	1.5015	0	1.5015	0.600601	2.4024	1.5015	10.2102	0.600601	0	15.015	0	0	0	0.600601	0	0.3003	0	1.8018	0	0	0	0	0	0	19.2192	3.3033	0	0	0	0	100
480	15605.4	0	0	0	0	0	0	0	11.2426	0.591716	14.2012	4.14201	0	0	0	0	0	10.355	0.295858	2.07101	0.887574	5.91716	1.18343	0.295858	23.9645	0	0	0	0.295858	0.295858	0.591716	0	0.591716	0	0	0	0.295858	0	0	7.69231	15.0888	0	0	0	0	100
485	15803.6	0	0	0	0	0	0	0	19.1824	0.628931	18.5535	4.71698	0	0	0	0	0	7.2327	1.57233	5.03145	3.45912	6.91824	1.88679	0.628931	16.9811	0	0	0	0.314465	0	2.20126	0	0.628931	0	0	0	0	0	0	10.0629	0	0	0	0	0	100
490	16041.8	0	0	0	0	0	0	0	15.0877	0.701754	11.2281	2.45614	0	0	0	0	0	2.45614	0	8.42105	0	8.42105	2.80702	0.701754	13.6842	0	0	0	0	0.350877	7.01754	0	0	0	0	0	0	0	0	26.6667	0	0	0	0	0	100
495	16279.9	0	0	0	0	0	0	0	42.8082	0.684932	12.6712	0.342466	0	0	0	0	0	1.71233	0.342466	3.76712	0	5.82192	2.39726	1.36986	21.2329	0	0	0	0	0.342466	2.73973	0	0	0	0	0	0	0	0	3.76712	0	0	0	0	0	100
500	16827.3	0	0	0	0	0	0	0	37.8151	0	8.82353	1.2605	0	0	0	0.420168	0	2.52101	0	0.840336	0	6.72269	0.420168	0.840336	13.8655	0	0	0	1.68067	0.840336	7.98319	0	2.52101	0	0.420168	0	0.420168	0	0	1.68067	1.68067	9.2437	0	0	0	100
505	17452.2	0	0	0	0	0	0	0	28.2297	0	15.311	1.43541	0	0	0	0	0	5.26316	0	2.87081	0	3.82775	1.43541	0.478469	28.2297	0	0	0	0	0.956938	4.30622	0	0	0	0	0	1.43541	0	0	0.956938	1.43541	3.34928	0.478469	0	0	100
510	18701.8	0	0	0	0	0	0	0	27.1137	0	12.2449	2.33236	0.291545	0	0	0.291545	0	0.291545	0.874636	1.45773	0	4.66472	0.874636	0.58309	37.9009	0	0	0	0	0.874636	5.24781	0	0.291545	0.874636	0	0	0.291545	0	0	0.874636	2.04082	0.291545	0.291545	0	0	100
515	19326.6	0	0	0	0	0	0	0	26.8519	0	15.2778	6.01852	0	0	0	0.462963	0	1.85185	0	2.77778	0	7.87037	0.462963	0	23.6111	0	0	0.462963	0	0.925926	3.7037	0	0.462963	0.462963	0	0	0.925926	0	0	4.16667	3.7037	0	0	0	0	100
520	19951.4	0	0	0	0	0	0	0	22.2222	0.483092	21.7391	6.28019	0	0	0	0	0	0	0.483092	0.966184	0.483092	3.86473	0	0	29.4686	0	0	0	0	0.483092	3.38164	0	0	0.483092	0	0	0.483092	0	0	2.41546	0.966184	4.83092	0.483092	0	0.483092	100
525	20576.2	0	1.2987	0	0	0	0	0	0	1.2987	18.1818	20.7792	0	0	0	0	0	1.2987	1.2987	0	0	7.79221	0	0	10.3896	0	0	0	1.2987	0	3.8961	0	0	0	0	0	0	0	0	2.5974	5.19481	23.3766	1.2987	0	0	100
530	21201	0	0	0	0	0	0	0	19.6429	0	31.7857	7.85714	0	0	0.357143	0	0	0.357143	0	3.21429	0	3.92857	0.357143	0	25.7143	0	0.357143	0	0	0	2.85714	0	0.357143	0	0	0	0	0	0	1.42857	1.42857	0.357143	0	0	0	100
535	21825.8	0	0	0	0.662252	0	0	0	13.9073	1.98675	20.5298	5.96026	0	0	0	0	0	0	0	2.64901	0	5.96026	0.662252	0.662252	33.1126	0	0.662252	0	0	0	3.31126	0	0.662252	1.98675	0	0	0	0	0	1.98675	5.29801	0	0	0	0	100
540	22450.6	0	0	0	0	0	0	0	24.4318	0.568182	26.1364	3.97727	0	0	0	0	0	0.568182	0.568182	2.27273	0	2.84091	0	1.13636	29.5455	0	0.568182	0	0	0	3.97727	0	0.568182	0	0	0	0	0	0	0.568182	0	2.27273	0	0	0	100
545	23075.5	0.638978	0.638978	0	0	0	0	0	21.4058	0	22.3642	5.11182	0	0	0	0.958466	0	0.958466	0	1.59744	0	5.11182	0.319489	0.319489	24.6006	0	0	0	1.27796	0	4.15335	0	0.638978	0	0	0	0	0	0	1.59744	0	5.7508	0	0	2.55591	100
550	23700.3	0	0	0	0	0	0	0	10.3448	0	24.1379	5.17241	0	0.862069	0	0.862069	0	1.72414	0	2.58621	0.862069	10.3448	0	0.862069	13.7931	0	0	0	0.862069	0.862069	8.62069	0	3.44828	0	0	0	0	0	0	1.72414	0	9.48276	1.72414	0	1.72414	100
555	24325.1	0	0	0	0	0	0	0	2.3569	0.673401	34.6801	6.06061	0	0	0	0.673401	0	0.673401	0	1.6835	0	3.367	0	0	39.0572	0	0	0	0.3367	0	4.3771	0	0.673401	0	0	0	0	0	0	2.3569	0	2.3569	0	0	0.673401	100
560	24686.5	0	0.790514	0	0	0	0	0	3.95257	1.18577	26.087	11.8577	0.395257	0	0	1.58103	0	0.790514	0	4.34783	0.790514	3.55731	0.395257	0.395257	32.0158	0	0	0	0	0	3.16206	0	0.790514	0	0	0	0	0	1.58103	3.16206	0	2.7668	0.395257	0	0	100
565	24872.4	0	0	0	0	0	0	0	4.40529	2.20264	26.8722	10.1322	0.440529	0.881057	0	0.881057	0	0.440529	0.440529	7.04846	0.881057	3.0837	0.440529	0.881057	26.8722	0	0	0	0	0	4.40529	0	0.440529	0	0	0	0	0	0	3.96476	2.20264	3.0837	0	0	0	100
570	25058.3	0	0	0	0	0	0.743494	0	1.48699	0.743494	26.3941	14.4981	0	0	0	0	0	1.11524	0.371747	4.08922	0	3.34572	0	0.743494	36.0595	0	0	0	0	0	4.46097	0	0.371747	0	0	0	0	0	0	2.97398	0.371747	2.23048	0	0	0	100
575	25244.1	0	0.308642	0	0	0	0	0	1.85185	0.617284	25.9259	25.9259	0	0.308642	0	0.617284	0	1.23457	0.308642	4.62963	0.617284	2.77778	0.308642	0.617284	23.7654	0	0	0	0.925926	0	0.925926	0	0.308642	0	0	0	0	0	0.308642	7.09877	0	0.617284	0	0	0	100
580	25430	0	0	0	0	0	0	0	0.574713	0.574713	37.931	19.5402	0	0.574713	0	0	0	2.29885	0	2.29885	0	5.74713	0.574713	1.14943	18.9655	0	0	0	0	0	4.5977	0	1.14943	0	0	0	0	0	0	1.72414	0.574713	1.72414	0	0	0	100
585	25615.9	0	0	0	0	0	0	0	1.38889	1.38889	37.037	12.963	0.462963	0	0	0	0	1.38889	0.462963	5.55556	0	1.85185	0	0	21.7593	0	0.462963	0	4.62963	0	4.16667	0	0	0	0.462963	0	0	0	0	3.7037	0	2.31481	0	0	0	100
590	25801.8	0	0.925926	0	0	0	0	0	0.462963	0.925926	50	13.8889	0	0	0	0	0	0	0.462963	0	0	2.77778	0	0.925926	21.7593	0	0	0	0.462963	0	2.31481	0	0	0	0	0	0	0	0	1.85185	0	2.77778	0	0.462963	0	100
595	25987.6	0	0	0	0	0	0	0	1.10803	0.277008	69.8061	4.43213	0	0	0	0.277008	0	0	0.277008	0.831025	0.277008	2.21607	0	0.277008	14.1274	0	0	0	1.10803	0	1.93906	0	0.554017	0	0	0	0	0	0	0.554017	0	1.66205	0	0.277008	0	100
600	26173.5	0	0	0	0	0	0	0	1.25224	0.536673	73.703	11.9857	0	0	0	0	0	0.357782	0	0.715564	0	3.9356	0	0.178891	4.11449	0	0	0	0.178891	0	0.715564	0	0	0	0	0	0	0	0	1.78891	0	0.536673	0	0	0	100
605	26359.4	0	0	0	0	0	0	0	2.54237	0	33.0508	6.77966	0	0	0	0	0	0.847458	0	1.69492	0	5.08475	0	0	38.9831	0	0	0	0.847458	0	3.38983	0	0	0	0	0	0	0	0	1.69492	0	4.23729	0.847458	0	0	100
610	26545.3	0	0	0	0	0	0	0	0.854701	1.7094	47.8632	3.4188	0	0	0	0	0	0	0	0	0	2.5641	0	0	41.0256	0	0	0	0	0	0.854701	0	0	0	0	0	0.854701	0	0	0.854701	0	0	0	0	0	100
615	26731.1	0	0	0	0	0	0	0	3.65854	2.43902	37.8049	7.31707	0	0	0	0	0	1.21951	0	0	0	8.53659	1.21951	0	23.1707	0	2.43902	0	1.21951	0	7.31707	0	1.21951	0	0	0	0	0	0	0	0	2.43902	0	0	0	100
620	26917	0	0	0	0	0	0	0	2.35294	0	49.4118	10.5882	0	0	1.17647	2.35294	0	0	0	1.17647	0	2.35294	0	1.17647	25.8824	0	0	0	0	0	0	0	0	0	0	0	0	0	0	1.17647	0	2.35294	0	0	0	100
625	27124.7	0	0	0	0	0	0	0	1.47992	0.422833	59.8309	6.55391	0	0	0	0.422833	0	0.211416	0	1.05708	0.845666	3.17125	0	0	21.3531	0	0	0.211416	0.634249	0	1.2685	0	0	0	0	0	0	0	0.211416	0.422833	1.90275	0	0	0	0	100
635	27332.4	0	0	0	0	0.515464	0	0	4.12371	0.515464	47.9381	1.03093	0	0	0	0	0	0.515464	0	1.03093	0	4.63918	0	0	29.8969	0	0	0	0.515464	0	1.54639	0	0	0	0	0	0.515464	0	0.515464	2.06186	3.09278	0	0	1.03093	0.515464	100
640	27540.1	0	0.793651	0	0	0	0	0	8.73016	0	48.4127	0.793651	0	0	0.793651	2.38095	0	0.793651	0	0	0	2.38095	0.793651	0	26.9841	0	0	0	3.1746	0	1.5873	0	0	0	0	0	0	0	0	2.38095	0	0	0	0	0	100
645	27747.8	0	0	0	0.643087	0	0	0	8.03859	0.321543	42.4437	0.96463	0	0	0	0.321543	0	0.643087	0	1.92926	0	2.89389	0	0.321543	29.9035	0	0	0	0.96463	0.321543	4.18006	0	0	0	0	0	0	0	0	0.643087	0.643087	2.57235	0	2.2508	0	100
650	27955.5	0	0	0	0	0	0	0	5.55556	2.77778	19.4444	0	0	0	0	0.925926	0	0	0	0.925926	0	4.62963	0	0	50.9259	0	0.925926	0	4.62963	0	0.925926	0	0	0.925926	0	0	0	0	0	1.85185	0	4.62963	0	0	0.925926	100
655	28163.2	0	0	0	0	0	0	0	7.7551	0.408163	26.1224	0.816327	0	0.408163	0.408163	1.63265	0	0.408163	0	1.22449	0	3.67347	0	0	47.7551	0	0	0	2.44898	0	2.04082	0	0	0.408163	0	0	0	0	0	1.22449	0.816327	2.04082	0	0.408163	0	100
665	28370.9	0	0.492611	0	0	0	0	0	7.38916	0.492611	40.3941	0	0	0	0	0.492611	0	0	0	0	0	4.4335	0	0	42.3645	0	0	0	0.985222	0	2.46305	0	0	0	0	0	0	0	0	0	0	0.492611	0	0	0	100
675	28698.1	0	0	0	0	0	0	0	44.358	1.16732	1.94553	1.94553	0	0	0	0	0	1.16732	0	8.56031	0	14.786	0.389105	0.389105	18.677	0	0	0	1.16732	0.77821	0.77821	0	0	0.389105	0	0	0	0	0	1.55642	0	1.94553	0	0	0	100
680	29511.9	0	0	0	0	0	0	0	39.0476	0.952381	3.80952	4.7619	0	0	0	0	0	0	0	0.952381	0	9.52381	0	0	35.2381	0	0.952381	0	2.85714	0	0	0	0	0	0	0	0	0	0	0.952381	0	0.952381	0	0	0	100
685	29918.8	0	0	0	0	0	0	0	26.875	0	3.125	3.125	0	0	0	0	0	2.5	0	2.5	1.25	6.25	0	0.625	32.5	0	0	0.625	4.375	0	1.875	0	0	0	0	0	0.625	0	0	0.625	1.25	11.25	0	0.625	0	100
690	30325.6	0	0	0	0	0	0	0	21.4286	2.38095	7.14286	2.38095	0	0	0	0	0	0	0	0	0	0	0	0	52.381	0	0	0	2.38095	0	4.7619	0	0	2.38095	0	0	0	0	0	0	0	2.38095	0	0	2.38095	100
695	30732.5	0	0	0	0	0	0	0	8.04598	2.29885	4.5977	0	0	0	0	0	0	2.29885	0	5.74713	0	4.5977	0	0	48.2759	0	1.14943	0	1.14943	0	0	0	0	0	0	0	1.14943	0	0	0	4.5977	14.9425	0	1.14943	0	100
700	31139.4	0	0	0	0	0	0	0	7.14286	0	10	0	0	0	0	0	0	0	0	7.14286	0	11.4286	0	0	28.5714	0	0	0	0	0	11.4286	0	0	1.42857	0	0	0	0	0	0	14.2857	7.14286	0	0	1.42857	100
711	31953.1	0	0	0	0	0	0	0	20.4301	1.07527	6.45161	3.22581	0	0	0	0	0	1.07527	0	8.60215	0	18.2796	2.15054	3.22581	21.5054	0	0	0	0	1.07527	4.30108	0	0	0	0	0	0	0	0	4.30108	1.07527	3.22581	0	0	0	100
716	32766.9	0	0	0	0	0	0	0	13.0435	2.6087	2.6087	4.34783	0	0	0	0	0	0	0	10.4348	0	21.7391	0.869565	0	28.6957	0	0	0	2.6087	0	6.08696	0	0	0	0	0	0.869565	1.73913	0	0.869565	0.869565	1.73913	0	0	0.869565	100
721	33056.6	0	0.892857	0	0	0	0	0	12.5	0	3.57143	1.78571	0	0	0	0	0.892857	0	0	3.57143	0	10.7143	0	0.892857	41.0714	0	0	0	0.892857	0	12.5	0	0	0.892857	0	0	0	1.78571	0	1.78571	0	5.35714	0	0	0.892857	100
725	33170.7	0	0	0	0	0	0	0	9.31677	2.48447	1.86335	1.86335	0	0	0	0	0	1.86335	0	4.96894	0	6.21118	0	0	40.3727	0	0	0.621118	3.10559	0	5.59006	0	0	0	0	0	0	0	3.10559	0	12.4224	4.34783	0	1.24224	0.621118	100
727	33284.8	0	0.925926	0	0	0	0	0	20.3704	1.85185	1.85185	9.25926	0	0	0	0	0	0.925926	0	25	0.925926	15.7407	0	0	13.8889	0	0	0	2.77778	0	1.85185	0	0	0.925926	0	0	0	0.925926	0	0.925926	0	1.85185	0	0	0	100
731	33398.9	0	0	0	0	0	0	0	20.9677	0	11.2903	0	0	0	0	0	0	0	0	1.6129	0	16.129	1.6129	0	35.4839	0	1.6129	0	0	1.6129	0	0	0	0	0	0	1.6129	4.83871	0	1.6129	0	1.6129	0	0	0	100
736	33512.9	0	0	0	0	0	0	0	12.5	0.833333	5	10.8333	0.833333	0	0	0	0	0.833333	0	8.33333	0	17.5	0	0	27.5	0	0	0	0.833333	0.833333	5.83333	0	0	0	0	0	0.833333	1.66667	0	3.33333	0	1.66667	0.833333	0	0	100
741	33763.9	0	0	0	0	0	0	0	7.22892	0	3.61446	16.8675	0	0	0	0	0	0	0	6.0241	0	13.253	0	1.20482	39.759	0	0	0	0	0	1.20482	0	0	0	0	0	0	4.81928	0	6.0241	0	0	0	0	0	100
747	33878	0	0	0	0	0	0	0	25.2632	0	3.15789	7.36842	0	0	0	1.05263	0	0	0	9.47368	0	14.7368	0	0	23.1579	0	0	0	1.05263	0	0	0	0	0	0	1.05263	1.05263	9.47368	0	2.10526	0	1.05263	0	0	0	100
750	33992	0	1.06383	0	0	0	0	0	7.44681	1.06383	4.25532	1.06383	0	0	0	0	0	0	2.12766	2.12766	0	2.12766	0	0	59.5745	0	1.06383	0	2.12766	0	2.12766	0	0	1.06383	0	0	0	0	2.12766	0	10.6383	0	0	0	0	100
751	34083.3	0	0	0	0	0	0	0	13.6364	0	2.72727	4.54545	0	0	0	0.909091	0	1.81818	0	4.54545	1.81818	5.45455	0	0	28.1818	0	0	0	0.909091	0.909091	6.36364	0	0	0	0	0	0	13.6364	0	4.54545	0	6.36364	0	2.72727	0.909091	100
756	34128.9	0	0	0	0	0	0	0	17.5573	0	2.29008	3.05344	0	0	0	0	0	0	0	2.29008	0	4.58015	0	0.763359	36.6412	0	0	0	0.763359	0	3.05344	0	0	0	0	0	0	25.1908	0	1.52672	0	1.52672	0	0.763359	0	100
761	34220.2	0	0	0	0	0	0	0	22.2222	0	0.925926	2.77778	0	0	0	0	0	0	0	2.77778	0	8.33333	0	0	24.0741	0	0	0	0	2.77778	2.77778	0	0	0	0	0.925926	0	26.8519	0	2.77778	0	1.85185	0	0.925926	0	100
767	34334.3	0	0	0	0	0	0.8	0	28	3.2	13.6	6.4	0	0	0	0	0.8	0	0	4	0.8	9.6	0	0	12.8	0	0	0	0	0	3.2	0	0.8	0	0	0	0	8	0	6.4	0	0.8	0	0	0.8	100
771	34448.3	0	2.89855	0	0	0	0	0	23.1884	0	4.34783	2.89855	0	0	0	0	0	2.89855	0	2.89855	1.44928	7.24638	0	0	30.4348	0	0	0	1.44928	1.44928	1.44928	0	0	0	0	0	0	15.942	0	1.44928	0	0	0	0	0	100
776	34585.2	0	0	0	0	0	0	0	38.835	0.970874	3.8835	1.94175	0	0	0	0	0	0	0	5.82524	3.8835	4.85437	0	0	15.534	0	0	0	0.970874	1.94175	2.91262	0	0	0	0	0	0.970874	15.534	0	0	0	1.94175	0	0	0	100
781	34653.7	0	0	0	0	0.378788	0	0	50	1.13636	0.378788	0.757576	0	0	0	0	0	1.51515	0	9.84848	1.89394	3.0303	0.378788	0	7.57576	0	0	0	0	0.378788	2.65152	0	0	0	0	0	0	17.803	0	0.378788	0	1.51515	0	0.378788	0	100
791	34676.5	0	0.8	0	0	0	0	0	48	0.8	0	2.4	0	0	0	0	0	0	0	1.6	0.8	2.4	0	0	15.2	0	0	0	0	0	5.6	0	0	0	0	0	0	20.8	0	0	0	1.6	0	0	0	100
796	34790.6	0	0	0	0	0	0	0	27.7228	0	0.990099	2.9703	0	0	0	0	0	0.990099	0	1.9802	0	0.990099	0	0	30.6931	0	0	0	0	0.990099	1.9802	0	0	0	0	0	0	30.6931	0	0	0	0	0	0	0	100
800	34904.6	0	0	0	0	0	0	0	42.2619	0	0	1.78571	0	0	0	0	0	0.595238	0	5.95238	0.595238	2.38095	0	0	27.9762	0	0	0	0	0.595238	3.57143	0	0	0.595238	0	0	0.595238	12.5	0	0	0	0.595238	0	0	0	100
805	35041.5	0	0	0	0	0	0	0	58.8235	0	0	1.96078	0	0	0	0	0	1.96078	0	3.92157	1.96078	1.96078	0	0	15.6863	0	0	0	0	0	0	0	0	0	0	0	0	13.7255	0	0	0	0	0	0	0	100
811	35132.8	0	0	0	0	0	0	0	52.0661	2.47934	0	0.826446	0	0	0	0	0	0	0	9.09091	0	3.30579	0	0	8.26446	0	0	0	0	1.65289	4.95868	0	0	0	0	0	0	13.2231	0	0	0.826446	3.30579	0	0	0	100
816	35246.9	0	0	0	0	0	0	0	47.0085	0.854701	0.854701	0	0	0	0	0	0	1.7094	0	7.69231	0.854701	0	0	0.854701	17.094	0	0	0	0.854701	0	6.83761	0	0	0	0	0	0.854701	8.54701	0	0	0	5.98291	0	0	0	100
821	35360.9	0	0.675676	0	0	0	0	0	53.3784	0	0	1.35135	0	0	0	0	0	0.675676	0	6.08108	0.675676	1.35135	0	0	8.10811	0	0	0	0	0	6.08108	0	0	0	0	0	0	19.5946	0	0	0.675676	1.35135	0	0	0	100
827	35589.1	0	0	0	0	0	0	0	54.3269	1.44231	1.44231	2.40385	0	0	0	0	0	0	0	3.84615	0.961538	2.40385	0	0	13.4615	0	0	0	0	0	3.84615	0	0	0	0	0	0	13.9423	0	0	0.480769	1.44231	0	0	0	100
831	35703.2	0	0.699301	0	0	0	0	0	65.035	0.699301	0.699301	0.699301	0	0	0	0	0	0	0	3.4965	0	0	0	0	13.986	0	0	0	0	0	2.0979	0	0	0	0	0	0	12.5874	0	0	0	0	0	0	0	100
836	35817.2	0	0	0	0	0	0	0	72.7273	0.779221	1.03896	1.2987	0	0	0	0	0	0.25974	0	3.37662	0	0	0	0	5.97403	0	0	0	0	0	2.5974	0	0	0	0	0	0	8.83117	0	0	1.03896	2.07792	0	0	0	100
841	35908.5	0	0	0	0	0	0	0	90.8304	0	0.865052	0.519031	0	0	0	0.17301	0	0	0	0.519031	0.346021	0.17301	0	0	1.55709	0	0	0	0	0	0.17301	0	0	0.17301	0	0	0	4.49827	0	0	0	0	0	0	0.17301	100
847	36045.4	0	0.348432	0	0	0	0	0	77.3519	0.348432	2.09059	5.92334	0	0	0	0	0	0	0	1.74216	0.696864	0	0	0	8.36237	0	0	0	0	0	1.39373	0	0	0	0	0	0	1.39373	0	0	0.348432	0	0	0	0	100
851	36159.5	0	0.396825	0	0	0	0	0	71.0317	0	2.77778	3.57143	0	0	0	0	0	0	0	2.38095	0	0.396825	0	0	16.2698	0	0	0	0.396825	0	1.5873	0	0	0	0	0	0	0.793651	0	0	0.396825	0	0	0	0	100
857	36273.5	0	0	0	0	0	0	0	83.2117	0	1.09489	7.66423	0	0	0	0	0	0.364964	0	0.364964	0	0	0	0	6.20438	0	0	0	0	0	1.09489	0	0	0	0	0	0	0	0	0	0	0	0	0	0	100
861	36387.6	0	0.675676	0	0	0	0	0	47.973	0	1.35135	9.45946	0	0	0	0	0	0	0	1.35135	0	0	0	0	35.8108	0	0	0	0	0	2.02703	0	0	0	0	0	0	1.35135	0	0	0	0	0	0	0	100
867	36501.7	0	0	0	0	0	0	0	46.2264	0	5.66038	15.0943	0	0	0	0	0	0	0	3.77358	0	1.88679	0	0	19.8113	0	0	0	0	0	3.77358	0	0	0	0	0	0	3.77358	0	0	0	0	0	0	0	100
871	36615.8	0	1.78571	0	0	0	0	0	41.0714	1.78571	7.14286	10.7143	0	0	0	0	0	0	0	16.0714	1.78571	3.57143	0	0	16.0714	0	0	0	0	0	0	0	0	0	0	0	0	0	0	0	0	0	0	0	0	100
881	36729.8	0	0	0	0	0	0	0	25	10.7143	10.7143	14.2857	0	0	0	0	0	0	0	25	0	10.7143	0	0	0	0	0	0	0	0	0	0	0	0	0	0	0	0	0	3.57143	0	0	0	0	0	100
891	36866.7	0	1.5625	0	0	0	0	0	18.75	1.5625	10.9375	10.9375	0	4.6875	0	0	0	0	0	15.625	1.5625	4.6875	0	0	14.0625	0	0	0	0	0	4.6875	0	0	0	0	0	0	4.6875	0	0	1.5625	3.125	0	0	1.5625	100
896	36958	0	0	0	0	0	0	0	25	0	10	15	0	0	0	0	0	0	0	20	0	0	0	0	10	0	0	0	0	0	15	0	0	0	0	0	0	5	0	0	0	0	0	0	0	100
901	37137.7	0	0	0	0	0	0	0	41.4634	2.43902	14.6341	12.1951	0	0	0	0	0	0	0	21.9512	0	2.43902	0	0	4.87805	0	0	0	0	0	0	0	0	0	0	0	0	0	0	0	0	0	0	0	0	100
905	37257.5	0	0	0	0	0	0	0	51.2821	5.12821	2.5641	5.12821	0	0	0	0	0	0	0	17.9487	0	12.8205	0	0	0	0	0	0	0	0	0	0	0	0	0	0	0	2.5641	0	0	2.5641	0	0	0	0	100
911	37437.2	0	0	0	3.125	0	0	0	28.125	6.25	3.125	3.125	0	0	0	0	0	0	6.25	34.375	0	12.5	0	0	0	0	0	0	0	0	0	0	0	0	0	0	0	0	0	3.125	0	0	0	0	0	100
921	37557.1	0	0	0	0	0	0	0	9.375	0	1.5625	0	0	0	0	0	0	0	0	4.6875	0	3.125	0	1.5625	46.875	0	0	0	0	0	7.8125	0	0	0	0	0	1.5625	20.3125	0	0	0	3.125	0	0	0	100
926	37856.6	0	0	0	0	0	0	0	8.10811	2.7027	4.05405	6.75676	0	0	0	0	0	0	0	18.9189	1.35135	12.1622	0	0	31.0811	0	0	0	0	0	4.05405	0	0	0	0	0	0	5.40541	0	4.05405	0	0	0	0	1.35135	100
931	38156.1	0	0.833333	0	0	0	0	0	11.6667	3.33333	5	2.5	0	0.833333	0	0	0.833333	0	0	14.1667	0	2.5	0	0	41.6667	0.833333	0	0	0	0	5.83333	0	0	0	0	0	0	6.66667	0	1.66667	0	0.833333	0	0	0.833333	100
936	38305.9	0	0	0	0	0	0	0	11.1111	0	7.40741	7.40741	0	0	0	0	0	0	0	40.7407	0	3.7037	0	0	22.2222	0	0	0	0	0	7.40741	0	0	0	0	0	0	0	0	0	0	0	0	0	0	100
941	38455.7	0	0	0	0	0	0	0	10.7143	1.78571	8.92857	8.92857	0	0	0	0	0	0	0	28.5714	0	3.57143	0	0	30.3571	0	0	0	0	0	1.78571	0	0	0	0	0	0	1.78571	0	3.57143	0	0	0	0	0	100
952	38575.5	0	0	0	0	0	0	0	7.36196	6.13497	3.68098	14.1104	0	0	0	0	0	0	0	20.8589	0.613497	6.74847	0	0	17.7914	0	0	0	0	0.613497	1.84049	0	0	0	0	0	0	0.613497	0	19.6319	0	0	0	0	0	100
956	38755.2	0	3.27869	0	0	0	0	0	3.27869	8.19672	6.55738	4.91803	0	0	0	0	0	0	0	27.8689	0	1.63934	0	0	34.4262	0	0	0	0	1.63934	3.27869	0	0	0	0	0	0	0	0	4.91803	0	0	0	0	0	100
961	39190.3	0	0	0	0	0	0	0	6.86695	9.01288	11.1588	2.14592	0	0	0	0	0	1.71674	0.429185	15.4506	0.429185	6.86695	0.429185	0.429185	15.8798	0	0	0	0	0	3.43348	0	0	0	0	0	0	0.429185	0	24.4635	0.858369	0	0	0	0	100
966	39453.1	0	0	0	0.925926	0	0	0	7.40741	3.7037	8.33333	5.55556	0	0	0	0.925926	0	0.925926	0	13.8889	2.77778	6.48148	0	0	30.5556	0	0	0	0	0	5.55556	0.925926	0	1.85185	0	0	0	1.85185	0	7.40741	0.925926	0	0	0	0	100
971	39715.9	0	0	0	0	0	0	0	10.8696	6.52174	1.08696	2.17391	0	0	0	0	0	0	1.08696	36.9565	3.26087	13.0435	0	0	15.2174	0	0	0	0	0	2.17391	0	0	0	0	0	0	0	0	7.6087	0	0	0	0	0	100
976	39978.6	0	0	0	0	0	0	0	8.82353	10.2941	5.88235	2.94118	0	0	0	0	0	1.47059	0	45.5882	1.47059	4.41176	0	0	8.82353	0	0	0	0	0	4.41176	0	0	0	0	0	0	0	0	4.41176	1.47059	0	0	0	0	100
981	40241.4	0	0	0	0	0	0	0	2.0202	13.1313	6.06061	9.09091	0	1.0101	0	0	0	0	0	30.303	2.0202	8.08081	1.0101	0	9.09091	0	0	0	1.0101	0	12.1212	0	0	0	0	0	0	2.0202	0	3.0303	0	0	0	0	0	100
986	40819.5	0	0	0	1.23457	0	0	0	9.87654	7.40741	4.93827	7.40741	0	0	0	1.23457	0	0	0	24.6914	0	8.64198	0	0	25.9259	0	0	0	0	0	4.93827	0	0	0	0	0	0	0	0	0	0	1.23457	0	2.46914	0	100
993	41029.7	0	0	0	0	0	0	0	17.6471	3.92157	0	11.7647	0	0	0	0	0	0	0	35.2941	0	7.84314	1.96078	0	9.80392	0	0	0	0	1.96078	1.96078	0	0	1.96078	0	0	0	5.88235	0	0	0	0	0	0	0	100
1001	41292.4	0	0	0	0	0	0	0	16.6667	13.3333	0	3.33333	0	0	0	0	0	0	0	15	1.66667	8.33333	0	1.66667	23.3333	0	0	0	0	0	8.33333	0	0	0	0	0	0	1.66667	0	3.33333	0	3.33333	0	0	0	100
1006	41592.3	0	2.67857	0	0	0	0	0	25	6.25	0.892857	3.57143	0	0	0	0	0	0	0	35.7143	0.892857	6.25	0	0	9.82143	0	0	0	0.892857	0	5.35714	0	0	0	0	0	0	0.892857	0	0.892857	0	0.892857	0	0	0	100
	41901.5
	42210.7
	42519.8
	42829
	43243.5
	43591.9
	43809.7

## Sheet: Concentration
Depth (cm)	Age ka cal. BP	Number of Lycopodium	Sample volume (cc)	Counted cysts	Counted lycopodium grains	Concentration cyst/cm3	Freshwater concentration
0	791.142	12542	12	259	131	2066.4	0
5	1256.07	12542	6	440	270	3406.47	0
10	1699.83	12542	5	537	363	3710.77	0
15	2123.15	12542	6.8	382	258	2730.87	0
20	2526.77	12542	8.5	429	243	2604.95	0
25	2911.39	12542	8	605	305	3109.8	0
30	3277.73	12542	5	411	280	3681.97	0
35	3626.48	12542	6.8	479	133	6642.66	0
40	3958.32	12542	5	748	281	6677.16	0
45	4273.93	12542	7	695	111	11218.4	0
50	4573.97	12542	8	615	132	7304.29	0
55	4859.09	12542	7	560	264	3800.61	0
60	5129.95	12542	5	644	271	5960.92	0
65	5387.16	12542	7	620	102	10890.8	0
70	5631.37	12542	5	497	259	4813.42	0
75	5863.17	12542	9	440	195	3144.43	0
80	6083.18	12542	5	448	456	2464.39	0
85	6291.98	12542	6	302	274	2303.94	0
90	6490.15	12542	5	200	730	687.233	0
95	6678.27	12542	5.5	154	457	768.438	0
100	6856.91	12542	10	75	312	301.49	0
105	7026.6	12542	6.5	65	344	364.593	0
110	7187.9	12542	9	283	456	864.86	3.05604
120	7487.42	12542	5	131	712	461.517	10.5691
125	7626.67	12542	8.5	119	416	422.087	0
130	7759.58	12542	5	118	379	780.979	0
135	7886.65	12542	7.5	73	295	413.815	0
140	8008.36	12542	5	163	463	883.087	0
145	8125.16	12542	6	84	239	734.678	0
150	8237.53	12542	8.5	178	762	344.677	0
155	8345.91	12542	9	60	135	619.358	0
160	8450.74	12542	5	168	500	842.822	0
170	8651.45	12542	5	105	537	490.469	0
175	8748.16	12542	8.5	65	258	371.742	0
180	8842.97	12542	6	101	425	496.762	0
190	9028.43	12542	5	110	377	731.894	0
195	9119.83	12542	6	98	528	387.979	0
200	9210.82	12542	7.5	92	412	373.419	0
205	9301.74	12542	8.9	80	235	479.732	0
210	9392.93	12542	12	122	331	385.228	0
215	9484.72	12542	8.6	66	200	481.263	0
220	9577.42	12542	10.5	99	265	446.238	0
225	9671.34	12542	10	128	718	223.59	0
230	9766.78	12542	10.5	118	296	476.176	0
240	9963.31	12542	10	187	495	473.809	0
250	10169.2	12542	9.5	119	1031	152.381	0
260	10386.4	12542	11	129	342	430.069	0
265	10499.8	12542	8.2	66	224	450.66	0
270	10616.7	12542	10	118	467	316.907	0
280	10861.9	12542	11	151	362	475.601	0
285	10990.5	12542	7.1	67	207	571.759	0
290	11123.3	12542	10	266	852	391.569	0
295	11260.6	12542	7.6	85	198	708.446	0
300	11402.4	12542	10	120	512	293.953	0
305	11549	12542	6.3	70	312	446.652	0
310	11700.4	12542	10	128	425	377.736	0
315	11856.7	12542	6.8	77	333	426.486	0
320	12018.1	12542	10	272	831	410.52	0
330	12356.5	12542	10	136	351	485.958	0
335	12533.7	12542	8.2	94	185	777.158	0
340	12716.3	12542	10	175	476	461.103	0
345	12904.3	12542	9.1	85	138	848.917	0
350	13097.9	12542	8.5	113	241	691.846	0
355	13297	12542	7.7	85	203	682.023	0
360	13501.7	12542	10	134	326	515.53	3.84724
365	13712	12542	7.4	137	195	1190.75	8.69161
370	13927.9	12542	10	179	307	731.276	0
375	14149.4	12542	10	340	187	2280.36	0
380	14376.5	12542	10	203	367	693.74	3.41744
385	14609.2	12542	7.2	150	206	1268.41	8.45604
390	14847.4	12542	9.5	181	363	658.287	0
395	15091.1	12542	8.9	76	153	700.001	0
400	15340.2	12542	8	164	535	480.581	0
415	16119.5	12542	9	207	509	566.731	2.73783
420	16389.7	12542	7	307	574	958.286	0
425	16664.8	12542	11	92	545	192.471	14.6445
430	16944.9	12542	7	312	620	901.637	0
435	17229.7	12542	8	133	201	1037.37	7.79975
440	17519.2	12542	7	431	470	1643.04	7.62432
445	17813.2	12542	8.5	356	74	7098.49	0
450	18111.5	12542	9	323	87	5173.78	0
455	18413.9	12542	8.8	358	142	3593.18	0
460	18720.4	12542	7	316	195	2903.5	0
465	19030.7	12542	9.3	305	167	2463.02	0
475	19661.8	12542	12.5	333	265	1260.83	0
480	19982.3	12542	7	338	185	3273.51	0
485	20305.7	12542	9	318	222	1996.17	0
490	20631.8	12542	8	285	218	2049.58	0
495	20960.4	12542	9.3	292	260	1514.58	0
500	21291.2	12542	8.5	238	153	2295.27	0
505	21624	12542	8.8	209	176	1692.46	0
510	21958.4	12542	10	343	301	1429.2	0
515	22294.2	12542	8.2	216	142	2326.58	0
520	22631	12542	11	207	73	3233.12	0
525	22968.6	12542	10	77	377	256.163	0
530	23306.7	12542	9	280	368	1060.31	0
535	23644.8	12542	8.8	151	163	1320.3	0
540	23982.7	12542	8	176	159	1735.37	0
545	24320.1	12542	8.9	313	268	1645.84	0
550	24656.5	12542	10	116	91	1598.76	0
555	24991.6	12542	9.8	297	360	1055.83	0
560	25324.9	12542	10.5	253	219	1379.92	0
565	25656.2	12542	9	227	236	1340.41	0
570	25985	12542	9	269	209	1793.62	6.66773
575	26310.9	12542	11	324	418	883.777	2.72771
580	26633.5	12542	9	174	186	1303.65	0
585	26952.3	12542	8.8	216	240	1282.7	5.93845
590	27266.8	12542	10	216	185	1464.36	0
595	27576.8	12542	9.4	361	118	4081.92	0
600	27881.6	12542	9.5	559	231	3194.8	0
605	28180.8	12542	8.6	118	86	2001.02	16.9578
610	28473.9	12542	9.5	117	97	1592.42	40.8313
615	28760.5	12542	8.2	82	53	2366.42	28.8587
620	29039.9	12542	10	85	18	5922.61	139.356
625	29311.8	12542	10	473	207	2865.88	6.05894
635	29830.6	12542	7.9	194	143	2153.8	22.2041
640	30076.5	12542	10.2	126	30	5164.35	122.961
645	30312.6	12542	7.9	311	225	2194.41	14.112
650	30538.4	12542	10	108	78	1736.58	0
655	30753.2	12542	7.7	245	375	1064.17	0
665	31147.9	12542	8.4	203	208	1457.2	0
675	31491.8	12542	10	257	343	939.736	3.65656
680	31715.2	12542	10.2	105	112	1152.76	10.9786
685	31938.6	12542	9.1	160	122	1807.53	0
690	32162.1	12542	10.3	42	38	1345.85	32.0439
695	32385.5	12542	8.8	87	92	1347.77	0
700	32608.9	12542	10.5	70	45	1858.07	26.5439
711	33100.5	20848	6.2	93	325	962.215	0
716	33323.9	20848	6.5	115	775	475.934	4.13856
721	33547.3	20848	7.5	112	819	380.134	3.39406
725	33726.1	12542	11	161	291	630.822	3.91815
727	33815.4	20848	7	108	819	392.741	10.9095
731	33994.2	20848	6.9	62	408	459.142	14.811
736	34217.6	20848	7.4	120	554	610.245	0
741	34441.1	20848	9.8	83	563	313.623	11.3358
747	34709.2	20848	7	95	636	444.87	0
750	34843.2	12542	10	94	114	1034.16	0
751	34887.9	20848	7.4	110	545	568.629	5.16935
756	35111.4	20848	7.5	131	564	645.647	4.92861
761	35334.8	20848	7.5	108	343	875.251	8.10418
767	35602.9	20848	7.5	125	686	506.511	12.1563
771	35781.6	20848	7.6	69	581	325.78	9.44288
776	36005.1	20848	7.6	103	304	929.425	0
781	36228.5	20848	8.4	264	265	2472.54	9.36568
791	36675.4	20848	7.2	125	245	1477.32	11.8186
796	36898.8	20848	7.5	101	204	1376.24	0
800	37077.5	20848	7	168	413	1211.51	7.21135
805	37301	20848	7.4	51	196	733.072	14.374
811	37569.1	20848	7.8	121	186	1738.77	28.74
816	37792.5	20848	7.6	117	225	1426.44	0
821	38016	20848	7.5	148	202	2036.64	0
827	38284.1	20848	7.2	208	411	1465.39	0
831	38462.8	20848	9	143	274	1208.95	16.9084
836	38686.2	20848	7.3	385	305	3604.98	9.36358
841	38909.7	20848	8.1	578	238	6250.72	10.8144
847	39177.8	20848	6.3	287	334	2843.54	9.9078
851	39356.5	20848	8.6	252	272	2245.94	8.91245
857	39624.7	20848	6.5	274	429	2048.54	0
861	39803.4	20848	7.3	148	443	954.112	0
867	40071.5	20848	7.2	106	749	409.785	7.73179
871	40250.3	20848	7.6	56	335	458.558	8.18853
881	40697.1	20848	7.6	28	193	397.971	14.2133
891	41144	20848	7.5	64	551	322.873	25.2244
896	41367.4	20848	10	20	172	242.419	12.1209
901	41590.9	20848	8.8	41	742	130.907	3.19284
905	41769.6	20848	7.3	39	956	116.506	0
911	42037.7	20848	7.5	32	928	95.8529	5.9908
921	42484.6	20848	6.2	64	638	337.312	5.2705
926	42708	20848	7.5	74	838	245.466	6.63421
931	42931.4	20848	7.2	120	795	437.065	3.64221
936	43154.9	20848	9.7	27	165	351.7	13.0259
941	43378.3	20848	7.8	56	469	319.143	11.398
952	43869.9	20848	6.3	163	617	874.231	0
956	44048.6	20848	8.6	61	328	450.839	7.39081
961	44272	20848	6.1	233	652	1221.36	5.24188
966	44495.5	20848	7	108	531	605.753	5.60882
971	44718.9	20848	7.5	92	443	577.281	0
976	44942.3	20848	7.3	68	506	383.796	0
981	45165.8	20848	7.5	99	740	371.883	7.51279
986	45389.2	20848	6.8	81	353	703.503	0
993	45702	20848	6.3	51	262	644.158	0
1001	46059.5	20848	6.1	60	283	724.602	12.0767
1006	46282.9	20848	7	112	553	603.197	16.1571

## Sheet: Transfer Function
Age cal. BP	PRODModis (g/m²/year)	Minimal statistical distance
1465.04	390.659	1.05914
1614.02	370.593	0.996536
1763	368.306	0.882119
1911.98	392.023	1.47421
2060.96	554.991	1.23739
2209.94	375.118	1.15899
2358.92	568.273	1.16744
2507.9	396.24	1.18961
2656.88	386.324	1.20103
2805.86	388.445	1.13368
2954.84	388.673	0.879638
3103.82	471.111	1.0738
3252.8	388.214	1.02692
3401.78	363.136	1.03498
3550.76	381.124	1.32807
3699.75	363.017	0.940396
3848.73	394.107	0.942095
3997.71	352.315	1.489
4146.69	170.645	1.65574
4295.67	340.652	1.97566
4444.65	386.08	2.11328
4593.63	381.738	0.670504
4742.61	229.411	1.72285
4891.59	519.887	1.73136
5040.57	259.686	1.45296
5189.55	563.499	1.55855
5338.53	381.106	1.98935
5487.51	656.518	1.30971
5636.49	484.574	1.4663
5785.47	651.18	1.07383
5934.45	386.536	2.31144
6083.43	653.393	2.10864
6232.41	NA	2.35977
6381.39	558.213	1.83421
6530.37	784.16	2.03007
6679.35	NA	2.68711
6828.33	784.091	2.21541
6977.31	NA	2.44796
7126.29	NA	2.7917
7275.27	NA	2.49386
7424.25	1060.76	2.28737
7573.24	1060.76	2.23749
7722.22	NA	2.35931
7871.2	708.589	1.65419
8020.18	785.008	1.88191
8169.16	796.6	1.60957
8318.14	1060.76	2.03433
8467.12	1060.76	2.23638
8616.1	801.679	1.74446
8765.08	NA	2.889
8914.06	728.37	1.68637
9063.04	NA	2.33295
9212.02	NA	2.72275
9361	715.597	1.92459
9542.32	NA	2.60727
9723.63	NA	2.56277
9904.95	NA	2.78602
10086.3	1060.76	1.96847
10267.6	767.692	1.41572
10448.9	608.138	2.16107
10630.2	1060.76	2.03323
10811.5	1060.76	2.0596
10992.8	719.242	1.62852
11174.2	NA	2.46951
11355.5	775.403	2.05677
11666.9	868.075	1.60309
11816.3	509.849	1.95674
11965.6	187.86	1.95212
12115	797.312	1.88927
12264.3	1060.76	2.15508
12413.6	777.304	1.79134
12594.1	681.857	1.72529
12782.3	663.922	1.72196
12970.5	NA	2.55209
13158.7	725.308	1.83567
13346.9	NA	2.34139
13535.1	NA	2.3402
13723.3	NA	2.57191
13911.5	507.761	1.7202
14099.8	572.598	1.77717
14664.4	280.86	1.29037
14852.6	282.031	1.61875
15040.8	327.913	1.68572
15229	256.695	1.63252
15417.2	252.712	1.78251
15605.4	166.468	2.02019
15803.6	249.598	1.62262
16041.8	276.37	1.69692
16279.9	291.978	1.0805
16827.3	239.249	2.01225
17452.2	287.459	1.97816
18701.8	399.193	1.46567
19326.6	361.954	2.09597
19951.4	366.793	1.87431
20576.2	762.03	2.01315
21201	375.76	1.45243
21825.8	237.631	1.45145
22450.6	357.538	1.45954
23075.5	237.549	1.81243
23700.3	160.22	2.14093
24325.1	567.433	1.3513
24686.5	337.403	1.75787
24872.4	431.811	1.7289
25058.3	562.29	1.46885
25244.1	226.401	1.441
25430	527.183	1.46999
25615.9	462.501	1.86564
25801.8	634.417	1.57554
25987.6	559.735	1.00505
26173.5	433.243	1.31692
26359.4	559.574	1.62626
26545.3	536.674	1.46311
26731.1	610.279	1.65688
26917	406.479	1.85621
27124.7	511.245	1.45593
27332.4	623.968	1.5352
27540.1	325.445	1.14935
27747.8	466.325	1.50579
27955.5	698.97	1.90026
28163.2	616.201	1.7441
28370.9	428.883	1.33196
28698.1	205.879	1.61865
29511.9	300.589	2.01739
29918.8	NA	2.42217
30325.6	656.956	1.82224
30732.5	547.659	2.03002
31139.4	706.097	1.63739
31953.1	310.075	1.65678
32766.9	587.719	2.05884
33056.6	179.9	2.17435
33170.7	690.321	1.81845
33284.8	187.83	2.2374
33398.9	374.137	2.08661
33512.9	NA	2.71283
33763.9	424.35	2.31239
33878	NA	2.56972
33992	734.008	1.21819
34083.3	NA	3.08858
34128.9	368.7	2.29696
34220.2	NA	2.35878
34334.3	NA	2.3778
34448.3	NA	2.47682
34585.2	NA	2.7565
34653.7	331.564	2.17121
34676.5	368.7	1.97669
34790.6	368.7	2.20731
34904.6	NA	2.40425
35041.5	368.7	2.1797
35132.8	NA	2.34497
35246.9	NA	2.40144
35360.9	368.7	1.96414
35589.1	368.7	2.00912
35703.2	356.853	1.7158
35817.2	454.581	1.68358
35908.5	385.903	1.19572
36045.4	402.841	1.73919
36159.5	398.108	1.54834
36273.5	307.532	1.91075
36387.6	380.434	1.94684
36501.7	361.814	2.09502
36615.8	312.621	1.63136
36729.8	116.67	2.202
36866.7	NA	2.52823
36958	NA	2.56263
37137.7	399.272	1.69613
37257.5	NA	2.44509
37437.2	316.042	1.54052
37557.1	719.64	2.19379
37856.6	NA	2.38592
38156.1	499.81	2.25245
38305.9	393.154	1.96319
38455.7	488.312	2.14624
38575.5	NA	2.53162
38755.2	489.392	1.81084
39190.3	162.316	1.55963
39453.1	NA	2.7575
39715.9	159.272	2.04234
39978.6	413.578	2.14917
40241.4	NA	2.60875
40819.5	422.527	1.63689
41029.7	NA	2.39921
41292.4	NA	2.74693
41592.3	282.795	2.03619
41901.5
42210.7
42519.8
42829
43243.5
43591.9
43809.7
