# Supplementary material for: Dinocyst assemblage constraints oceanographic and atmospheric processes in the Eastern Equatorial Atlantic over the last 44 ka
Source: Copernicus journal article supplement (doi:10.5194/bg-2016-148), 2016-04-21
Supplement: Supplementary file [file bg-2016-148-RC1-supplement.pdf]

Rimouski June 9, 2016

Natascha Töpfer  
Copernicus Publications  
Editorial Support

Dear Mrs Töpfer,

Please find attached my evaluation report and annotated copy of the manuscript BG-2016-148 “**Dinocyst assemblage constraints on oceanographic and atmospheric processes in the Eastern Equatorial Atlantic over the last 44 ka**”, by William H, Penaud A, Marret F, Bayon G, Marsset T and Droz L, submitted for publication in *BioGeosciences*. I recommend the manuscript for publication, pending minor modifications, which are highlighted in the attached documents.

With my Best Regards,

A handwritten signature in blue ink, appearing to read "André Rochon".

André Rochon  
Professor – Marine Geology  
ISMER-UQAR  
310 allée des Ursulines  
Rimouski QC, Canada  
G5L 3 A1  
Tel. 1-418-723-1986, ext. 1742  
[Andre\\_rochon@uqar.ca](mailto:Andre_rochon@uqar.ca)
